# Supplementary material
Source: Royal Society of Chemistry journal article supplement (doi:10.1039/d6cp00427j)
Supplement: d6cp00427j1.pdf [file d6cp00427j1.pdf]

## Alternative Graph-4-yne Stacking Fashion: Toward selective CO<sub>2</sub> Capture

Luca Mancini<sup>\*a</sup> Giacomo Giorgi<sup>b,c,d,e</sup> Yusuf Bramastya Apriliyanto<sup>f</sup> Andrea Lombardi<sup>\*a,b</sup> and Noelia Faginas-Lago<sup>a,b</sup>

*a Dipartimento di Chimica, Biologia e Biotecnologie, Università degli Studi di Perugia, 06123, Perugia, Italy*

*b Istituto CNR di Scienze e Tecnologie Chimiche "Giulio Natta" (CNR-SCITEC), 06123, Perugia, Italy*

*c Dipartimento di Ingegneria Civile e Ambientale, Università degli Studi di Perugia, 06125, Perugia, Italy*

*d CIRIAF - Interuniversity Research Centre University of Perugia Italy*

*e Centro S3 CNR-Istituto Nanoscienze Via G. Campi 213-a Modena 41125 Italy Italy*

*f Department of Chemistry Indonesia Defense University Kampus Unhan Komplek IPSC Sentul Bogor 16810 Indonesia*

\* [andrea.lombardi@unipg.it](mailto:andrea.lombardi@unipg.it), [luca.mancini@unipg.it](mailto:luca.mancini@unipg.it)

### S.1. Cartesian coordinates of the initial configuration (AB, stack-9 structure) used for the MD analysis

|   |            |            |          |
|---|------------|------------|----------|
| C | -16.876929 | -22.461665 | 0.000000 |
| C | -24.249298 | -9.682045  | 0.000000 |
| C | -2.130774  | -22.461665 | 0.000000 |
| C | -9.503144  | -9.682045  | 0.000000 |
| C | -16.875515 | 3.097573   | 0.000000 |
| C | -17.505734 | -21.378463 | 0.000000 |
| C | -24.878104 | -8.598845  | 0.000000 |
| C | -2.759580  | -21.378463 | 0.000000 |
| C | -10.131951 | -8.598845  | 0.000000 |
| C | -17.504321 | 4.180775   | 0.000000 |
| C | 11.314072  | -20.214317 | 0.000000 |
| C | 3.941702   | -7.434698  | 0.000000 |
| C | -3.430668  | 5.344919   | 0.000000 |
| C | -18.178241 | -20.214317 | 0.000000 |
| C | -25.550611 | -7.434698  | 0.000000 |
| C | -3.432087  | -20.214317 | 0.000000 |
| C | -10.804457 | -7.434698  | 0.000000 |
| C | -18.176828 | 5.344919   | 0.000000 |
| C | 10.684280  | -19.121122 | 0.000000 |
| C | 3.311908   | -6.341505  | 0.000000 |
| C | -4.060462  | 6.438116   | 0.000000 |
| C | -18.808034 | -19.121122 | 0.000000 |
| C | -26.180405 | -6.341505  | 0.000000 |
| C | -4.061881  | -19.121122 | 0.000000 |
| C | -11.434250 | -6.341505  | 0.000000 |
| C | -18.806621 | 6.438116   | 0.000000 |
| C | -24.249227 | -14.616805 | 0.000000 |
| C | -9.503070  | -14.616805 | 0.000000 |
| C | -16.875440 | -1.837187  | 0.000000 |
| C | -24.247812 | 10.942433  | 0.000000 |
| C | 5.243087   | -14.616805 | 0.000000 |
| C | -2.129284  | -1.837187  | 0.000000 |
| C | -9.501656  | 10.942433  | 0.000000 |
| C | -24.877837 | -15.700325 | 0.000000 |
| C | -10.131680 | -15.700325 | 0.000000 |
| C | -17.504050 | -2.920707  | 0.000000 |
| C | -24.876420 | 9.858913   | 0.000000 |
| C | 4.614477   | -15.700325 | 0.000000 |
| C | -2.757893  | -2.920707  | 0.000000 |
| C | -10.130264 | 9.858913   | 0.000000 |
| C | -25.550518 | -16.864498 | 0.000000 |
| C | -10.804360 | -16.864498 | 0.000000 |
| C | -18.176730 | -4.084880  | 0.000000 |
| C | -25.549101 | 8.694740   | 0.000000 |
| C | 3.941797   | -16.864498 | 0.000000 |
| C | -3.430572  | -4.084880  | 0.000000 |
| C | -10.802945 | 8.694740   | 0.000000 |
| C | -26.180291 | -17.957808 | 0.000000 |
| C | -11.434131 | -17.957808 | 0.000000 |
| C | -18.806504 | -5.178187  | 0.000000 |
| C | -26.178874 | 7.601431   | 0.000000 |
| C | 3.312025   | -17.957808 | 0.000000 |
| C | -4.060346  | -5.178187  | 0.000000 |
| C | -11.432716 | 7.601431   | 0.000000 |
| C | -27.351131 | -24.928898 | 0.000000 |
| C | -12.604973 | -24.928898 | 0.000000 |
| C | -19.977169 | -12.149584 | 0.000000 |
| C | -27.349538 | 0.630032   | 0.000000 |
| C | 2.141186   | -24.928898 | 0.000000 |
| C | -5.231009  | -12.149584 | 0.000000 |
| C | -12.603378 | 0.630032   | 0.000000 |

|   |            |            |          |
|---|------------|------------|----------|
| C | -18.724386 | -12.150771 | 0.000000 |
| C | -26.096754 | 0.628845   | 0.000000 |
| C | -3.978229  | -12.150771 | 0.000000 |
| C | -11.350597 | 0.628845   | 0.000000 |
| C | -17.380709 | -12.150835 | 0.000000 |
| C | -24.753079 | 0.628780   | 0.000000 |
| C | -17.379293 | 13.408401  | 0.000000 |
| C | -2.634552  | -12.150835 | 0.000000 |
| C | -10.006922 | 0.628780   | 0.000000 |
| C | -16.118326 | -12.150108 | 0.000000 |
| C | -23.490695 | 0.629506   | 0.000000 |
| C | -16.116909 | 13.409128  | 0.000000 |
| C | -1.372168  | -12.150108 | 0.000000 |
| C | -8.744537  | 0.629506   | 0.000000 |
| C | -21.399798 | -14.617062 | 0.000000 |
| C | -28.772170 | -1.837444  | 0.000000 |
| C | -6.653643  | -14.617062 | 0.000000 |
| C | -14.026013 | -1.837444  | 0.000000 |
| C | -21.398384 | 10.942177  | 0.000000 |
| C | -20.772970 | -15.701310 | 0.000000 |
| C | -28.145342 | -2.921689  | 0.000000 |
| C | -6.026814  | -15.701310 | 0.000000 |
| C | -13.399185 | -2.921689  | 0.000000 |
| C | -20.771556 | 9.857928   | 0.000000 |
| C | -20.101060 | -16.865163 | 0.000000 |
| C | -27.473432 | -4.085542  | 0.000000 |
| C | -5.354903  | -16.865163 | 0.000000 |
| C | -12.727275 | -4.085542  | 0.000000 |
| C | -20.099646 | 8.694076   | 0.000000 |
| C | -19.473259 | -17.959226 | 0.000000 |
| C | -26.845630 | -5.179607  | 0.000000 |
| C | -4.727100  | -17.959226 | 0.000000 |
| C | -12.099472 | -5.179607  | 0.000000 |
| C | -19.471843 | 7.600011   | 0.000000 |
| C | -28.774500 | -22.460949 | 0.000000 |
| C | -14.028341 | -22.460949 | 0.000000 |
| C | -21.400713 | -9.681330  | 0.000000 |
| C | -28.773083 | 3.098291   | 0.000000 |
| C | 0.717816   | -22.460949 | 0.000000 |
| C | -6.654554  | -9.681330  | 0.000000 |
| C | -14.026926 | 3.098291   | 0.000000 |
| C | -28.148687 | -21.375882 | 0.000000 |
| C | -13.402529 | -21.375882 | 0.000000 |
| C | -20.774900 | -8.596263  | 0.000000 |
| C | -28.147270 | 4.183355   | 0.000000 |
| C | 1.343630   | -21.375882 | 0.000000 |
| C | -6.028741  | -8.596263  | 0.000000 |
| C | -13.401112 | 4.183355   | 0.000000 |
| C | -27.476499 | -20.211928 | 0.000000 |
| C | -12.730341 | -20.211928 | 0.000000 |
| C | -20.102712 | -7.432309  | 0.000000 |
| C | -27.475082 | 5.347310   | 0.000000 |
| C | 2.015815   | -20.211928 | 0.000000 |
| C | -5.356555  | -7.432309  | 0.000000 |
| C | -12.728927 | 5.347310   | 0.000000 |
| C | -26.847610 | -19.118491 | 0.000000 |
| C | -12.101453 | -19.118491 | 0.000000 |
| C | -19.473824 | -6.338871  | 0.000000 |
| C | -26.846196 | 6.440747   | 0.000000 |
| C | 2.644705   | -19.118491 | 0.000000 |
| C | -4.727666  | -6.338871  | 0.000000 |
| C | -12.100037 | 6.440747   | 0.000000 |
| C | -18.297507 | -24.928898 | 0.000000 |
| C | -25.670061 | -12.148960 | 0.000000 |
| C | -3.551350  | -24.928898 | 0.000000 |

|   |            |            |          |
|---|------------|------------|----------|
| C | -10.923905 | -12.148960 | 0.000000 |
| C | -18.296274 | 0.630659   | 0.000000 |
| C | 11.194809  | -24.928898 | 0.000000 |
| C | 3.822255   | -12.148960 | 0.000000 |
| C | -3.550115  | 0.630659   | 0.000000 |
| C | -19.549802 | -24.927684 | 0.000000 |
| C | -26.922172 | -12.148065 | 0.000000 |
| C | -4.803644  | -24.927684 | 0.000000 |
| C | -12.176016 | -12.148065 | 0.000000 |
| C | -19.548386 | 0.631555   | 0.000000 |
| C | 9.942514   | -24.927684 | 0.000000 |
| C | 2.570143   | -12.148065 | 0.000000 |
| C | -4.802227  | 0.631555   | 0.000000 |
| C | -20.892578 | -24.927722 | 0.000000 |
| C | -28.264950 | -12.148103 | 0.000000 |
| C | -6.146422  | -24.927722 | 0.000000 |
| C | -13.518793 | -12.148103 | 0.000000 |
| C | -20.891164 | 0.631516   | 0.000000 |
| C | 8.599737   | -24.927722 | 0.000000 |
| C | 1.227366   | -12.148103 | 0.000000 |
| C | -6.145004  | 0.631516   | 0.000000 |
| C | -22.154090 | -24.928424 | 0.000000 |
| C | -7.407933  | -24.928424 | 0.000000 |
| C | -14.780304 | -12.148805 | 0.000000 |
| C | -22.152674 | 0.630814   | 0.000000 |
| C | 7.338224   | -24.928424 | 0.000000 |
| C | -0.034147  | -12.148805 | 0.000000 |
| C | -7.406517  | 0.630814   | 0.000000 |
| C | -28.756380 | -24.928898 | 0.000000 |
| C | -14.010222 | -24.928898 | 0.000000 |
| C | -21.382534 | -12.149382 | 0.000000 |
| C | -28.754905 | 0.630239   | 0.000000 |
| C | 0.735935   | -24.928898 | 0.000000 |
| C | -6.636375  | -12.149382 | 0.000000 |
| C | -14.008748 | 0.630239   | 0.000000 |
| C | -16.172870 | -23.679281 | 0.000000 |
| C | -23.545240 | -10.899662 | 0.000000 |
| C | -1.426713  | -23.679281 | 0.000000 |
| C | -8.799083  | -10.899662 | 0.000000 |
| C | -16.171453 | 1.879957   | 0.000000 |
| C | -23.545002 | -13.399394 | 0.000000 |
| C | -8.798846  | -13.399394 | 0.000000 |
| C | -16.171215 | -0.619775  | 0.000000 |
| C | -23.543586 | 12.159843  | 0.000000 |
| C | 5.947311   | -13.399394 | 0.000000 |
| C | -1.425059  | -0.619775  | 0.000000 |
| C | -8.797429  | 12.159843  | 0.000000 |
| C | -16.893024 | -24.928898 | 0.000000 |
| C | -24.265328 | -12.149392 | 0.000000 |
| C | -2.146866  | -24.928898 | 0.000000 |
| C | -9.519172  | -12.149392 | 0.000000 |
| C | -16.891541 | 0.630224   | 0.000000 |
| C | 12.599293  | -24.928898 | 0.000000 |
| C | 5.226986   | -12.149392 | 0.000000 |
| C | -2.145383  | 0.630224   | 0.000000 |
| C | -22.102998 | -13.399202 | 0.000000 |
| C | -7.356840  | -13.399202 | 0.000000 |
| C | -14.729211 | -0.619583  | 0.000000 |
| C | -22.101582 | 12.160035  | 0.000000 |
| C | -14.730939 | -23.679089 | 0.000000 |
| C | -22.103310 | -10.899470 | 0.000000 |
| C | 0.015220   | -23.679089 | 0.000000 |
| C | -7.357151  | -10.899470 | 0.000000 |
| C | -14.729522 | 1.880149   | 0.000000 |
| C | -26.098173 | -24.930392 | 0.000000 |

|   |            |            |          |
|---|------------|------------|----------|
| C | -11.352014 | -24.930392 | 0.000000 |
| C | 3.394144   | -24.930392 | 0.000000 |
| C | -24.261325 | 15.869573  | 0.000000 |
| C | -24.890130 | 16.952773  | 0.000000 |
| C | -10.816477 | 18.116920  | 0.000000 |
| C | -25.562636 | 18.116920  | 0.000000 |
| C | -11.446271 | 19.210114  | 0.000000 |
| C | -26.192431 | 19.210114  | 0.000000 |
| C | -16.887463 | 23.714431  | 0.000000 |
| C | -17.516072 | 22.630911  | 0.000000 |
| C | -18.188752 | 21.466739  | 0.000000 |
| C | -18.818525 | 20.373430  | 0.000000 |
| C | -19.989365 | 13.402340  | 0.000000 |
| C | -28.784192 | 23.714175  | 0.000000 |
| C | -28.157363 | 22.629928  | 0.000000 |
| C | -27.485453 | 21.466075  | 0.000000 |
| C | -26.857650 | 20.372010  | 0.000000 |
| C | -21.412734 | 15.870288  | 0.000000 |
| C | -20.786921 | 16.955354  | 0.000000 |
| C | -20.114735 | 18.119309  | 0.000000 |
| C | -19.485845 | 19.212747  | 0.000000 |
| C | -25.681900 | 13.402340  | 0.000000 |
| C | -10.935740 | 13.402340  | 0.000000 |
| C | -26.934195 | 13.403553  | 0.000000 |
| C | -12.188035 | 13.403553  | 0.000000 |
| C | -28.276972 | 13.403515  | 0.000000 |
| C | -13.530814 | 13.403515  | 0.000000 |
| C | -14.792326 | 13.402812  | 0.000000 |
| C | -21.394614 | 13.402340  | 0.000000 |
| C | -23.557263 | 14.651957  | 0.000000 |
| C | -16.183239 | 24.931842  | 0.000000 |
| C | -24.277417 | 13.402340  | 0.000000 |
| C | -9.531258  | 13.402340  | 0.000000 |
| C | -22.115330 | 14.652147  | 0.000000 |
| C | -18.736407 | 13.400844  | 0.000000 |
| C | -24.741058 | -24.923600 | 0.000000 |
| C | -9.994900  | -24.923600 | 0.000000 |
| C | 4.751257   | -24.923600 | 0.000000 |
| C | -23.478675 | -24.922873 | 0.000000 |
| C | -8.732516  | -24.922873 | 0.000000 |
| C | 6.013642   | -24.922873 | 0.000000 |
| C | 12.638013  | -22.461665 | 0.000000 |
| C | 5.265643   | -9.682045  | 0.000000 |
| C | -2.106729  | 3.097573   | 0.000000 |
| C | 27.384172  | -22.461665 | 0.000000 |
| C | 20.011802  | -9.682045  | 0.000000 |
| C | 12.639432  | 3.097573   | 0.000000 |
| C | 27.385585  | 3.097573   | 0.000000 |
| C | 26.755367  | -21.378463 | 0.000000 |
| C | 19.382995  | -8.598845  | 0.000000 |
| C | 12.010625  | 4.180775   | 0.000000 |
| C | 26.756778  | 4.180775   | 0.000000 |
| C | 26.082860  | -20.214317 | 0.000000 |
| C | 18.710489  | -7.434698  | 0.000000 |
| C | 11.338119  | 5.344919   | 0.000000 |
| C | 26.084273  | 5.344919   | 0.000000 |
| C | 25.453066  | -19.121122 | 0.000000 |
| C | 18.080696  | -6.341505  | 0.000000 |
| C | 10.708324  | 6.438116   | 0.000000 |
| C | 25.454479  | 6.438116   | 0.000000 |
| C | 20.011872  | -14.616805 | 0.000000 |
| C | 12.639501  | -1.837187  | 0.000000 |
| C | 5.267131   | 10.942433  | 0.000000 |
| C | 27.385659  | -1.837187  | 0.000000 |
| C | 20.013288  | 10.942433  | 0.000000 |

|   |           |            |          |
|---|-----------|------------|----------|
| C | 19.383264 | -15.700325 | 0.000000 |
| C | 12.010893 | -2.920707  | 0.000000 |
| C | 4.638522  | 9.858913   | 0.000000 |
| C | 26.757050 | -2.920707  | 0.000000 |
| C | 19.384680 | 9.858913   | 0.000000 |
| C | 18.710583 | -16.864498 | 0.000000 |
| C | 11.338212 | -4.084880  | 0.000000 |
| C | 3.965841  | 8.694740   | 0.000000 |
| C | 26.084370 | -4.084880  | 0.000000 |
| C | 18.712000 | 8.694740   | 0.000000 |
| C | 18.080810 | -17.957808 | 0.000000 |
| C | 10.708438 | -5.178187  | 0.000000 |
| C | 3.336069  | 7.601431   | 0.000000 |
| C | 25.454597 | -5.178187  | 0.000000 |
| C | 18.082227 | 7.601431   | 0.000000 |
| C | 16.909969 | -24.928898 | 0.000000 |
| C | 9.537774  | -12.149584 | 0.000000 |
| C | 2.165405  | 0.630032   | 0.000000 |
| C | 24.283932 | -12.149584 | 0.000000 |
| C | 16.911562 | 0.630032   | 0.000000 |
| C | 10.790556 | -12.150771 | 0.000000 |
| C | 3.418188  | 0.628845   | 0.000000 |
| C | 25.536714 | -12.150771 | 0.000000 |
| C | 18.164345 | 0.628845   | 0.000000 |
| C | -2.610508 | 13.408401  | 0.000000 |
| C | 12.134234 | -12.150835 | 0.000000 |
| C | 4.761864  | 0.628780   | 0.000000 |
| C | 12.135651 | 13.408401  | 0.000000 |
| C | 26.880391 | -12.150835 | 0.000000 |
| C | 19.508022 | 0.628780   | 0.000000 |
| C | 26.881806 | 13.408401  | 0.000000 |
| C | -1.348124 | 13.409128  | 0.000000 |
| C | 13.396617 | -12.150108 | 0.000000 |
| C | 6.024248  | 0.629506   | 0.000000 |
| C | 13.398034 | 13.409128  | 0.000000 |
| C | 28.142775 | -12.150108 | 0.000000 |
| C | 20.770405 | 0.629506   | 0.000000 |
| C | 28.144192 | 13.409128  | 0.000000 |
| C | 8.115144  | -14.617062 | 0.000000 |
| C | 0.742773  | -1.837444  | 0.000000 |
| C | -6.629599 | 10.942177  | 0.000000 |
| C | 22.861301 | -14.617062 | 0.000000 |
| C | 15.488931 | -1.837444  | 0.000000 |
| C | 8.116559  | 10.942177  | 0.000000 |
| C | 22.862716 | 10.942177  | 0.000000 |
| C | 8.741972  | -15.701310 | 0.000000 |
| C | 1.369600  | -2.921689  | 0.000000 |
| C | -6.002770 | 9.857928   | 0.000000 |
| C | 23.488129 | -15.701310 | 0.000000 |
| C | 16.115758 | -2.921689  | 0.000000 |
| C | 8.743389  | 9.857928   | 0.000000 |
| C | 23.489545 | 9.857928   | 0.000000 |
| C | 9.413882  | -16.865163 | 0.000000 |
| C | 2.041511  | -4.085542  | 0.000000 |
| C | -5.330858 | 8.694076   | 0.000000 |
| C | 24.160039 | -16.865163 | 0.000000 |
| C | 16.787668 | -4.085542  | 0.000000 |
| C | 9.415299  | 8.694076   | 0.000000 |
| C | 24.161455 | 8.694076   | 0.000000 |
| C | 10.041256 | -17.959226 | 0.000000 |
| C | 2.668886  | -5.179607  | 0.000000 |
| C | -4.703485 | 7.600011   | 0.000000 |
| C | 24.787841 | -17.959226 | 0.000000 |
| C | 17.415471 | -5.179607  | 0.000000 |
| C | 10.043100 | 7.600011   | 0.000000 |

|   |           |            |          |
|---|-----------|------------|----------|
| C | 24.789258 | 7.600011   | 0.000000 |
| C | 15.486600 | -22.460949 | 0.000000 |
| C | 8.114230  | -9.681330  | 0.000000 |
| C | 0.741858  | 3.098291   | 0.000000 |
| C | 22.860388 | -9.681330  | 0.000000 |
| C | 15.488017 | 3.098291   | 0.000000 |
| C | 16.112413 | -21.375882 | 0.000000 |
| C | 8.740044  | -8.596263  | 0.000000 |
| C | 1.367673  | 4.183355   | 0.000000 |
| C | 23.486200 | -8.596263  | 0.000000 |
| C | 16.113830 | 4.183355   | 0.000000 |
| C | 16.784600 | -20.211928 | 0.000000 |
| C | 9.412230  | -7.432309  | 0.000000 |
| C | 2.039859  | 5.347310   | 0.000000 |
| C | 24.158389 | -7.432309  | 0.000000 |
| C | 16.786017 | 5.347310   | 0.000000 |
| C | 17.413490 | -19.118491 | 0.000000 |
| C | 10.041118 | -6.338871  | 0.000000 |
| C | 2.668747  | 6.440747   | 0.000000 |
| C | 24.787275 | -6.338871  | 0.000000 |
| C | 17.414904 | 6.440747   | 0.000000 |
| C | 25.963594 | -24.928898 | 0.000000 |
| C | 18.591040 | -12.148960 | 0.000000 |
| C | 11.218668 | 0.630659   | 0.000000 |
| C | 25.964825 | 0.630659   | 0.000000 |
| C | 24.711299 | -24.927684 | 0.000000 |
| C | 17.338929 | -12.148065 | 0.000000 |
| C | 9.966558  | 0.631555   | 0.000000 |
| C | 24.712713 | 0.631555   | 0.000000 |
| C | 23.368521 | -24.927722 | 0.000000 |
| C | 15.996151 | -12.148103 | 0.000000 |
| C | 8.623779  | 0.631516   | 0.000000 |
| C | 23.369937 | 0.631516   | 0.000000 |
| C | 22.107010 | -24.928424 | 0.000000 |
| C | 14.734639 | -12.148805 | 0.000000 |
| C | 7.362267  | 0.630814   | 0.000000 |
| C | 29.480797 | -12.148805 | 0.000000 |
| C | 22.108425 | 0.630814   | 0.000000 |
| C | 15.504720 | -24.928898 | 0.000000 |
| C | 8.132409  | -12.149382 | 0.000000 |
| C | 0.760038  | 0.630239   | 0.000000 |
| C | 22.878567 | -12.149382 | 0.000000 |
| C | 15.506194 | 0.630239   | 0.000000 |
| C | 13.342073 | -23.679281 | 0.000000 |
| C | 5.969703  | -10.899662 | 0.000000 |
| C | -1.402667 | 1.879957   | 0.000000 |
| C | 28.088231 | -23.679281 | 0.000000 |
| C | 20.715860 | -10.899662 | 0.000000 |
| C | 13.343490 | 1.879957   | 0.000000 |
| C | 28.089647 | 1.879957   | 0.000000 |
| C | 20.716098 | -13.399394 | 0.000000 |
| C | 13.343727 | -0.619775  | 0.000000 |
| C | 5.971356  | 12.159843  | 0.000000 |
| C | 28.089885 | -0.619775  | 0.000000 |
| C | 20.717513 | 12.159843  | 0.000000 |
| C | 27.368077 | -24.928898 | 0.000000 |
| C | 19.995772 | -12.149392 | 0.000000 |
| C | 12.623402 | 0.630224   | 0.000000 |
| C | 27.369559 | 0.630224   | 0.000000 |
| C | 7.411944  | -13.399202 | 0.000000 |
| C | 0.039573  | -0.619583  | 0.000000 |
| C | -7.332796 | 12.160035  | 0.000000 |
| C | 22.158102 | -13.399202 | 0.000000 |
| C | 14.785732 | -0.619583  | 0.000000 |
| C | 7.413360  | 12.160035  | 0.000000 |

|   |            |            |          |
|---|------------|------------|----------|
| C | 29.531889  | -0.619583  | 0.000000 |
| C | 22.159519  | 12.160035  | 0.000000 |
| C | 14.784004  | -23.679089 | 0.000000 |
| C | 7.411633   | -10.899470 | 0.000000 |
| C | 0.039262   | 1.880149   | 0.000000 |
| C | 29.530161  | -23.679089 | 0.000000 |
| C | 22.157791  | -10.899470 | 0.000000 |
| C | 14.785421  | 1.880149   | 0.000000 |
| C | 29.531578  | 1.880149   | 0.000000 |
| C | 12.009208  | -21.378463 | 0.000000 |
| C | 4.636837   | -8.598845  | 0.000000 |
| C | -2.735534  | 4.180775   | 0.000000 |
| C | 18.162927  | -24.930392 | 0.000000 |
| C | -9.492537  | 15.869573  | 0.000000 |
| C | 5.253622   | 15.869573  | 0.000000 |
| C | 19.999775  | 15.869573  | 0.000000 |
| C | 4.624816   | 16.952773  | 0.000000 |
| C | 19.370970  | 16.952773  | 0.000000 |
| C | 3.952310   | 18.116920  | 0.000000 |
| C | 18.698463  | 18.116920  | 0.000000 |
| C | 3.322516   | 19.210114  | 0.000000 |
| C | 18.068669  | 19.210114  | 0.000000 |
| C | -2.118677  | 23.714431  | 0.000000 |
| C | 12.627479  | 23.714431  | 0.000000 |
| C | 27.373636  | 23.714431  | 0.000000 |
| C | -2.747286  | 22.630911  | 0.000000 |
| C | 11.998871  | 22.630911  | 0.000000 |
| C | 26.745027  | 22.630911  | 0.000000 |
| C | -3.419967  | 21.466739  | 0.000000 |
| C | 11.326190  | 21.466739  | 0.000000 |
| C | 26.072347  | 21.466739  | 0.000000 |
| C | -4.049741  | 20.373430  | 0.000000 |
| C | 10.696419  | 20.373430  | 0.000000 |
| C | 25.442574  | 20.373430  | 0.000000 |
| C | -5.220580  | 13.402340  | 0.000000 |
| C | 9.525576   | 13.402340  | 0.000000 |
| C | 24.271735  | 13.402340  | 0.000000 |
| C | -14.015406 | 23.714175  | 0.000000 |
| C | 0.730751   | 23.714175  | 0.000000 |
| C | 15.476907  | 23.714175  | 0.000000 |
| C | -13.388578 | 22.629928  | 0.000000 |
| C | 1.357579   | 22.629928  | 0.000000 |
| C | 16.103737  | 22.629928  | 0.000000 |
| C | -12.716667 | 21.466075  | 0.000000 |
| C | 2.029489   | 21.466075  | 0.000000 |
| C | 16.775647  | 21.466075  | 0.000000 |
| C | -12.089294 | 20.372010  | 0.000000 |
| C | 2.657291   | 20.372010  | 0.000000 |
| C | 17.403450  | 20.372010  | 0.000000 |
| C | -6.643949  | 15.870288  | 0.000000 |
| C | 8.102208   | 15.870288  | 0.000000 |
| C | 22.848367  | 15.870288  | 0.000000 |
| C | -6.018136  | 16.955354  | 0.000000 |
| C | 8.728022   | 16.955354  | 0.000000 |
| C | 23.474180  | 16.955354  | 0.000000 |
| C | -5.345949  | 18.119309  | 0.000000 |
| C | 9.400208   | 18.119309  | 0.000000 |
| C | 24.146366  | 18.119309  | 0.000000 |
| C | -4.717060  | 19.212747  | 0.000000 |
| C | 10.029096  | 19.212747  | 0.000000 |
| C | 24.775254  | 19.212747  | 0.000000 |
| C | 3.833044   | 13.402340  | 0.000000 |
| C | 18.579200  | 13.402340  | 0.000000 |
| C | 2.580748   | 13.403553  | 0.000000 |
| C | 17.326905  | 13.403553  | 0.000000 |

|    |            |            |          |
|----|------------|------------|----------|
| C  | 1.237972   | 13.403515  | 0.000000 |
| C  | 15.984127  | 13.403515  | 0.000000 |
| C  | -0.023540  | 13.402812  | 0.000000 |
| C  | 14.722618  | 13.402812  | 0.000000 |
| C  | 29.468774  | 13.402812  | 0.000000 |
| C  | -6.625831  | 13.402340  | 0.000000 |
| C  | 8.120328   | 13.402340  | 0.000000 |
| C  | 22.866485  | 13.402340  | 0.000000 |
| C  | -8.788476  | 14.651957  | 0.000000 |
| C  | 5.957681   | 14.651957  | 0.000000 |
| C  | 20.703837  | 14.651957  | 0.000000 |
| C  | -1.414452  | 24.931842  | 0.000000 |
| C  | 13.331705  | 24.931842  | 0.000000 |
| C  | 28.077862  | 24.931842  | 0.000000 |
| C  | 5.237527   | 13.402340  | 0.000000 |
| C  | 19.983684  | 13.402340  | 0.000000 |
| C  | -14.718606 | 24.932035  | 0.000000 |
| C  | 0.027553   | 24.932035  | 0.000000 |
| C  | 14.773710  | 24.932035  | 0.000000 |
| C  | -7.346546  | 14.652147  | 0.000000 |
| C  | 7.399611   | 14.652147  | 0.000000 |
| C  | 22.145770  | 14.652147  | 0.000000 |
| C  | -10.121343 | 16.952773  | 0.000000 |
| C  | -3.967623  | 13.400844  | 0.000000 |
| C  | 10.778536  | 13.400844  | 0.000000 |
| C  | 25.524694  | 13.400844  | 0.000000 |
| C  | 19.520042  | -24.923600 | 0.000000 |
| C  | 20.782425  | -24.922873 | 0.000000 |
| C  | 29.542495  | 24.932035  | 0.000000 |
| C1 | -26.708894 | -22.462188 | 3.658301 |
| C1 | -11.962737 | -22.462188 | 3.658301 |
| C1 | -19.335107 | -9.682569  | 3.658301 |
| C1 | -26.707477 | 3.097049   | 3.658301 |
| C1 | 2.783421   | -22.462188 | 3.658301 |
| C1 | -4.588950  | -9.682569  | 3.658301 |
| C1 | -11.961320 | 3.097049   | 3.658301 |
| C1 | -27.337169 | -21.378733 | 3.658301 |
| C1 | -12.591010 | -21.378733 | 3.658301 |
| C1 | -19.963382 | -8.599113  | 3.658301 |
| C1 | -27.335752 | 4.180504   | 3.658301 |
| C1 | 2.155146   | -21.378733 | 3.658301 |
| C1 | -5.217225  | -8.599113  | 3.658301 |
| C1 | -12.589595 | 4.180504   | 3.658301 |
| C1 | -28.010274 | -20.215366 | 3.658301 |
| C1 | -13.264117 | -20.215366 | 3.658301 |
| C1 | -20.636488 | -7.435746  | 3.658301 |
| C1 | -28.008858 | 5.343873   | 3.658301 |
| C1 | 1.482042   | -20.215366 | 3.658301 |
| C1 | -5.890329  | -7.435746  | 3.658301 |
| C1 | -13.262700 | 5.343873   | 3.658301 |
| C1 | -28.638251 | -19.121531 | 3.658301 |
| C1 | -13.892095 | -19.121531 | 3.658301 |
| C1 | -21.264466 | -6.341914  | 3.658301 |
| C1 | -28.636837 | 6.437706   | 3.658301 |
| C1 | 0.854063   | -19.121531 | 3.658301 |
| C1 | -6.518307  | -6.341914  | 3.658301 |
| C1 | -13.890678 | 6.437706   | 3.658301 |
| C1 | -19.334864 | -14.617854 | 3.658301 |
| C1 | -26.707235 | -1.838234  | 3.658301 |
| C1 | -4.588707  | -14.617854 | 3.658301 |
| C1 | -11.961078 | -1.838234  | 3.658301 |
| C1 | -19.333448 | 10.941384  | 3.658301 |
| C1 | -19.961659 | -15.702319 | 3.658301 |
| C1 | -27.334031 | -2.922699  | 3.658301 |
| C1 | -5.215502  | -15.702319 | 3.658301 |

|    |            |            |          |
|----|------------|------------|----------|
| C1 | -12.587872 | -2.922699  | 3.658301 |
| C1 | -19.960244 | 9.856919   | 3.658301 |
| C1 | -20.634577 | -16.865751 | 3.658301 |
| C1 | -28.006947 | -4.086132  | 3.658301 |
| C1 | -5.888420  | -16.865751 | 3.658301 |
| C1 | -13.260791 | -4.086132  | 3.658301 |
| C1 | -20.633161 | 8.693489   | 3.658301 |
| C1 | 8.857739   | -16.865751 | 3.658301 |
| C1 | 1.485369   | -4.086132  | 3.658301 |
| C1 | -5.887003  | 8.693489   | 3.658301 |
| C1 | -21.263700 | -17.959163 | 3.658301 |
| C1 | -28.636071 | -5.179543  | 3.658301 |
| C1 | -6.517543  | -17.959163 | 3.658301 |
| C1 | -13.889914 | -5.179543  | 3.658301 |
| C1 | -21.262284 | 7.600075   | 3.658301 |
| C1 | 8.228613   | -17.959163 | 3.658301 |
| C1 | 0.856243   | -5.179543  | 3.658301 |
| C1 | -6.516127  | 7.600075   | 3.658301 |
| C1 | -15.064758 | -12.150954 | 3.658301 |
| C1 | -22.437130 | 0.628665   | 3.658301 |
| C1 | -15.063341 | 13.408285  | 3.658301 |
| C1 | -0.318599  | -12.150954 | 3.658301 |
| C1 | -7.690969  | 0.628665   | 3.658301 |
| C1 | -28.558805 | -12.151333 | 3.658301 |
| C1 | -28.557388 | 13.407903  | 3.658301 |
| C1 | -13.812648 | -12.151333 | 3.658301 |
| C1 | -21.185018 | 0.628282   | 3.658301 |
| C1 | -13.811232 | 13.407903  | 3.658301 |
| C1 | 0.933508   | -12.151333 | 3.658301 |
| C1 | -6.438860  | 0.628282   | 3.658301 |
| C1 | -27.215967 | -12.150890 | 3.658301 |
| C1 | -12.469810 | -12.150890 | 3.658301 |
| C1 | -19.842181 | 0.628730   | 3.658301 |
| C1 | 2.276347   | -12.150890 | 3.658301 |
| C1 | -5.096025  | 0.628730   | 3.658301 |
| C1 | -18.582071 | -24.929445 | 3.658301 |
| C1 | -25.954442 | -12.149826 | 3.658301 |
| C1 | -3.835913  | -24.929445 | 3.658301 |
| C1 | -11.208284 | -12.149826 | 3.658301 |
| C1 | -18.580652 | 0.629791   | 3.658301 |
| C1 | 10.910244  | -24.929445 | 3.658301 |
| C1 | 3.537873   | -12.149826 | 3.658301 |
| C1 | -3.834497  | 0.629791   | 3.658301 |
| C1 | -16.486128 | -14.617752 | 3.658301 |
| C1 | -23.858498 | -1.838134  | 3.658301 |
| C1 | -1.739971  | -14.617752 | 3.658301 |
| C1 | -9.112341  | -1.838134  | 3.658301 |
| C1 | -16.484713 | 10.941486  | 3.658301 |
| C1 | -15.857833 | -15.701348 | 3.658301 |
| C1 | -23.230203 | -2.921728  | 3.658301 |
| C1 | -1.111674  | -15.701348 | 3.658301 |
| C1 | -8.484046  | -2.921728  | 3.658301 |
| C1 | -15.856416 | 9.857890   | 3.658301 |
| C1 | -15.186196 | -16.865801 | 3.658301 |
| C1 | -22.558567 | -4.086182  | 3.658301 |
| C1 | -0.440038  | -16.865801 | 3.658301 |
| C1 | -7.812409  | -4.086182  | 3.658301 |
| C1 | -15.184779 | 8.693435   | 3.658301 |
| C1 | -29.303231 | -17.959391 | 3.658301 |
| C1 | -14.557075 | -17.959391 | 3.658301 |
| C1 | -21.929445 | -5.179773  | 3.658301 |
| C1 | -29.301816 | 7.599844   | 3.658301 |
| C1 | 0.189084   | -17.959391 | 3.658301 |
| C1 | -7.183287  | -5.179773  | 3.658301 |
| C1 | -14.555656 | 7.599844   | 3.658301 |

|    |            |            |          |
|----|------------|------------|----------|
| C1 | -23.859281 | -22.462483 | 3.658301 |
| C1 | -9.113122  | -22.462483 | 3.658301 |
| C1 | -16.485492 | -9.682863  | 3.658301 |
| C1 | -23.857865 | 3.096757   | 3.658301 |
| C1 | 5.633034   | -22.462483 | 3.658301 |
| C1 | -1.739337  | -9.682863  | 3.658301 |
| C1 | -9.111707  | 3.096757   | 3.658301 |
| C1 | -23.231528 | -21.378452 | 3.658301 |
| C1 | -8.485371  | -21.378452 | 3.658301 |
| C1 | -15.857741 | -8.598833  | 3.658301 |
| C1 | -23.230111 | 4.180786   | 3.658301 |
| C1 | 6.260787   | -21.378452 | 3.658301 |
| C1 | -1.111584  | -8.598833  | 3.658301 |
| C1 | -8.483954  | 4.180786   | 3.658301 |
| C1 | -22.559673 | -20.213794 | 3.658301 |
| C1 | -7.813516  | -20.213794 | 3.658301 |
| C1 | -15.185887 | -7.434175  | 3.658301 |
| C1 | -22.558257 | 5.345446   | 3.658301 |
| C1 | 6.932640   | -20.213794 | 3.658301 |
| C1 | -0.439729  | -7.434175  | 3.658301 |
| C1 | -7.812101  | 5.345446   | 3.658301 |
| C1 | -21.930644 | -19.120037 | 3.658301 |
| C1 | -29.303016 | -6.340418  | 3.658301 |
| C1 | -7.184487  | -19.120037 | 3.658301 |
| C1 | -14.556857 | -6.340418  | 3.658301 |
| C1 | -21.929227 | 6.439201   | 3.658301 |
| C1 | 7.561670   | -19.120037 | 3.658301 |
| C1 | 0.189300   | -6.340418  | 3.658301 |
| C1 | -7.183071  | 6.439201   | 3.658301 |
| C1 | -28.131556 | -24.928898 | 3.658301 |
| C1 | -13.385400 | -24.928898 | 3.658301 |
| C1 | -20.757615 | -12.149546 | 3.658301 |
| C1 | -28.129987 | 0.630073   | 3.658301 |
| C1 | 1.360758   | -24.928898 | 3.658301 |
| C1 | -6.011457  | -12.149546 | 3.658301 |
| C1 | -13.383829 | 0.630073   | 3.658301 |
| C1 | -29.384199 | -24.927646 | 3.658301 |
| C1 | -14.638041 | -24.927646 | 3.658301 |
| C1 | -22.010412 | -12.148025 | 3.658301 |
| C1 | -29.382783 | 0.631594   | 3.658301 |
| C1 | 0.108117   | -24.927646 | 3.658301 |
| C1 | -7.264254  | -12.148025 | 3.658301 |
| C1 | -14.636625 | 0.631594   | 3.658301 |
| C1 | -15.981703 | -24.927377 | 3.658301 |
| C1 | -23.354073 | -12.147758 | 3.658301 |
| C1 | -1.235545  | -24.927377 | 3.658301 |
| C1 | -8.607916  | -12.147758 | 3.658301 |
| C1 | -15.980286 | 0.631861   | 3.658301 |
| C1 | 13.510611  | -24.927377 | 3.658301 |
| C1 | 6.138241   | -12.147758 | 3.658301 |
| C1 | -1.234130  | 0.631861   | 3.658301 |
| C1 | -17.244041 | -24.928028 | 3.658301 |
| C1 | -24.616412 | -12.148409 | 3.658301 |
| C1 | -2.497882  | -24.928028 | 3.658301 |
| C1 | -9.870254  | -12.148409 | 3.658301 |
| C1 | -17.242625 | 0.631209   | 3.658301 |
| C1 | 12.248273  | -24.928028 | 3.658301 |
| C1 | 4.875902   | -12.148409 | 3.658301 |
| C1 | -2.496468  | 0.631209   | 3.658301 |
| C1 | -16.469587 | -12.150429 | 3.658301 |
| C1 | -23.841959 | 0.629192   | 3.658301 |
| C1 | -16.468172 | 13.408810  | 3.658301 |
| C1 | -1.723429  | -12.150429 | 3.658301 |
| C1 | -9.095800  | 0.629192   | 3.658301 |
| C1 | -26.005446 | -23.679894 | 3.658301 |

|    |            |            |          |
|----|------------|------------|----------|
| C1 | -11.259287 | -23.679894 | 3.658301 |
| C1 | -18.631659 | -10.900275 | 3.658301 |
| C1 | -26.004030 | 1.879344   | 3.658301 |
| C1 | 3.486871   | -23.679894 | 3.658301 |
| C1 | -3.885501  | -10.900275 | 3.658301 |
| C1 | -11.257872 | 1.879344   | 3.658301 |
| C1 | -18.631767 | -13.400021 | 3.658301 |
| C1 | -26.004138 | -0.620401  | 3.658301 |
| C1 | -3.885609  | -13.400021 | 3.658301 |
| C1 | -11.257979 | -0.620401  | 3.658301 |
| C1 | -18.630350 | 12.159218  | 3.658301 |
| C1 | -26.726012 | -24.929613 | 3.658301 |
| C1 | -11.979855 | -24.929613 | 3.658301 |
| C1 | -19.352225 | -12.149995 | 3.658301 |
| C1 | -26.724598 | 0.629625   | 3.658301 |
| C1 | 2.766303   | -24.929613 | 3.658301 |
| C1 | -4.606067  | -12.149995 | 3.658301 |
| C1 | -11.978440 | 0.629625   | 3.658301 |
| C1 | -17.189851 | -13.400058 | 3.658301 |
| C1 | -24.562223 | -0.620440  | 3.658301 |
| C1 | -2.443693  | -13.400058 | 3.658301 |
| C1 | -9.816064  | -0.620440  | 3.658301 |
| C1 | -17.188434 | 12.159180  | 3.658301 |
| C1 | -24.563485 | -23.679932 | 3.658301 |
| C1 | -9.817327  | -23.679932 | 3.658301 |
| C1 | -17.189698 | -10.900315 | 3.658301 |
| C1 | -24.562069 | 1.879306   | 3.658301 |
| C1 | 4.928828   | -23.679932 | 3.658301 |
| C1 | -2.443541  | -10.900315 | 3.658301 |
| C1 | -9.815912  | 1.879306   | 3.658301 |
| C1 | -19.843597 | -24.930508 | 3.658301 |
| C1 | -5.097438  | -24.930508 | 3.658301 |
| C1 | 9.648718   | -24.930508 | 3.658301 |
| C1 | -19.347130 | 15.869048  | 3.658301 |
| C1 | -19.975404 | 16.952504  | 3.658301 |
| C1 | -20.648508 | 18.115872  | 3.658301 |
| C1 | -21.276487 | 19.209705  | 3.658301 |
| C1 | -26.719258 | 23.713383  | 3.658301 |
| C1 | -27.346052 | 22.628918  | 3.658301 |
| C1 | -28.018970 | 21.465487  | 3.658301 |
| C1 | -13.272811 | 21.465487  | 3.658301 |
| C1 | -28.648093 | 20.372075  | 3.658301 |
| C1 | -13.901936 | 20.372075  | 3.658301 |
| C1 | -25.966462 | 13.401791  | 3.658301 |
| C1 | -11.220306 | 13.401791  | 3.658301 |
| C1 | -23.870521 | 23.713486  | 3.658301 |
| C1 | -23.242224 | 22.629888  | 3.658301 |
| C1 | -22.570588 | 21.465436  | 3.658301 |
| C1 | -21.941465 | 20.371845  | 3.658301 |
| C1 | -16.497515 | 15.868754  | 3.658301 |
| C1 | -15.869763 | 16.952786  | 3.658301 |
| C1 | -15.197909 | 18.117444  | 3.658301 |
| C1 | -29.315037 | 19.211201  | 3.658301 |
| C1 | -14.568879 | 19.211201  | 3.658301 |
| C1 | -20.769792 | 13.402340  | 3.658301 |
| C1 | -22.022434 | 13.403591  | 3.658301 |
| C1 | -23.366094 | 13.403861  | 3.658301 |
| C1 | -8.619938  | 13.403861  | 3.658301 |
| C1 | -24.628432 | 13.403208  | 3.658301 |
| C1 | -9.882276  | 13.403208  | 3.658301 |
| C1 | -18.643680 | 14.651343  | 3.658301 |
| C1 | -26.016158 | 24.931217  | 3.658301 |
| C1 | -19.364248 | 13.401625  | 3.658301 |
| C1 | -24.574243 | 24.931179  | 3.658301 |
| C1 | -17.201722 | 14.651305  | 3.658301 |

|    |            |            |          |
|----|------------|------------|----------|
| C1 | -27.227988 | 13.400728  | 3.658301 |
| C1 | -12.481832 | 13.400728  | 3.658301 |
| C1 | -22.425106 | -24.923716 | 3.658301 |
| C1 | -7.678949  | -24.923716 | 3.658301 |
| C1 | 7.067209   | -24.923716 | 3.658301 |
| C1 | -21.172996 | -24.924097 | 3.658301 |
| C1 | -6.426838  | -24.924097 | 3.658301 |
| C1 | 8.319318   | -24.924097 | 3.658301 |
| C1 | -23.829936 | -24.923191 | 3.658301 |
| C1 | -9.083778  | -24.923191 | 3.658301 |
| C1 | 5.662378   | -24.923191 | 3.658301 |
| C1 | 17.552205  | -22.462188 | 3.658301 |
| C1 | 10.179835  | -9.682569  | 3.658301 |
| C1 | 2.807465   | 3.097049   | 3.658301 |
| C1 | 24.925992  | -9.682569  | 3.658301 |
| C1 | 17.553622  | 3.097049   | 3.658301 |
| C1 | 16.923931  | -21.378733 | 3.658301 |
| C1 | 9.551561   | -8.599113  | 3.658301 |
| C1 | 2.179190   | 4.180504   | 3.658301 |
| C1 | 24.297718  | -8.599113  | 3.658301 |
| C1 | 16.925348  | 4.180504   | 3.658301 |
| C1 | 16.250826  | -20.215366 | 3.658301 |
| C1 | 8.878455   | -7.435746  | 3.658301 |
| C1 | 1.506085   | 5.343873   | 3.658301 |
| C1 | 23.624613  | -7.435746  | 3.658301 |
| C1 | 16.252242  | 5.343873   | 3.658301 |
| C1 | 15.622848  | -19.121531 | 3.658301 |
| C1 | 8.250478   | -6.341914  | 3.658301 |
| C1 | 0.878108   | 6.437706   | 3.658301 |
| C1 | 22.996634  | -6.341914  | 3.658301 |
| C1 | 15.624263  | 6.437706   | 3.658301 |
| C1 | 10.180077  | -14.617854 | 3.658301 |
| C1 | 2.807707   | -1.838234  | 3.658301 |
| C1 | -4.564665  | 10.941384  | 3.658301 |
| C1 | 24.926236  | -14.617854 | 3.658301 |
| C1 | 17.553864  | -1.838234  | 3.658301 |
| C1 | 10.181494  | 10.941384  | 3.658301 |
| C1 | 24.927651  | 10.941384  | 3.658301 |
| C1 | 9.553283   | -15.702319 | 3.658301 |
| C1 | 2.180912   | -2.922699  | 3.658301 |
| C1 | -5.191458  | 9.856919   | 3.658301 |
| C1 | 24.299440  | -15.702319 | 3.658301 |
| C1 | 16.927070  | -2.922699  | 3.658301 |
| C1 | 9.554699   | 9.856919   | 3.658301 |
| C1 | 24.300856  | 9.856919   | 3.658301 |
| C1 | 23.626524  | -16.865751 | 3.658301 |
| C1 | 16.254154  | -4.086132  | 3.658301 |
| C1 | 8.881782   | 8.693489   | 3.658301 |
| C1 | 23.627938  | 8.693489   | 3.658301 |
| C1 | 22.997400  | -17.959163 | 3.658301 |
| C1 | 15.625029  | -5.179543  | 3.658301 |
| C1 | 8.252659   | 7.600075   | 3.658301 |
| C1 | 22.998815  | 7.600075   | 3.658301 |
| C1 | -0.294556  | 13.408285  | 3.658301 |
| C1 | 14.450186  | -12.150954 | 3.658301 |
| C1 | 7.077814   | 0.628665   | 3.658301 |
| C1 | 14.451600  | 13.408285  | 3.658301 |
| C1 | 29.196343  | -12.150954 | 3.658301 |
| C1 | 21.823971  | 0.628665   | 3.658301 |
| C1 | 29.197760  | 13.408285  | 3.658301 |
| C1 | 0.957553   | 13.407903  | 3.658301 |
| C1 | 15.702295  | -12.151333 | 3.658301 |
| C1 | 8.329925   | 0.628282   | 3.658301 |
| C1 | 15.703712  | 13.407903  | 3.658301 |
| C1 | 23.076082  | 0.628282   | 3.658301 |

|    |           |            |          |
|----|-----------|------------|----------|
| C1 | 17.045133 | -12.150890 | 3.658301 |
| C1 | 9.672762  | 0.628730   | 3.658301 |
| C1 | 24.418920 | 0.628730   | 3.658301 |
| C1 | 25.679029 | -24.929445 | 3.658301 |
| C1 | 18.306659 | -12.149826 | 3.658301 |
| C1 | 10.934290 | 0.629791   | 3.658301 |
| C1 | 25.680447 | 0.629791   | 3.658301 |
| C1 | 13.028814 | -14.617752 | 3.658301 |
| C1 | 5.656443  | -1.838134  | 3.658301 |
| C1 | -1.715928 | 10.941486  | 3.658301 |
| C1 | 27.774971 | -14.617752 | 3.658301 |
| C1 | 20.402601 | -1.838134  | 3.658301 |
| C1 | 13.030230 | 10.941486  | 3.658301 |
| C1 | 27.776387 | 10.941486  | 3.658301 |
| C1 | 13.657110 | -15.701348 | 3.658301 |
| C1 | 6.284738  | -2.921728  | 3.658301 |
| C1 | -1.087632 | 9.857890   | 3.658301 |
| C1 | 28.403267 | -15.701348 | 3.658301 |
| C1 | 21.030897 | -2.921728  | 3.658301 |
| C1 | 13.658525 | 9.857890   | 3.658301 |
| C1 | 28.404684 | 9.857890   | 3.658301 |
| C1 | 14.328748 | -16.865801 | 3.658301 |
| C1 | 6.956377  | -4.086182  | 3.658301 |
| C1 | -0.415994 | 8.693435   | 3.658301 |
| C1 | 29.074904 | -16.865801 | 3.658301 |
| C1 | 21.702534 | -4.086182  | 3.658301 |
| C1 | 14.330163 | 8.693435   | 3.658301 |
| C1 | 29.076321 | 8.693435   | 3.658301 |
| C1 | 14.957869 | -17.959391 | 3.658301 |
| C1 | 7.585497  | -5.179773  | 3.658301 |
| C1 | 0.213127  | 7.599844   | 3.658301 |
| C1 | 22.331654 | -5.179773  | 3.658301 |
| C1 | 14.959285 | 7.599844   | 3.658301 |
| C1 | 20.401819 | -22.462483 | 3.658301 |
| C1 | 13.029449 | -9.682863  | 3.658301 |
| C1 | 5.657077  | 3.096757   | 3.658301 |
| C1 | 27.775607 | -9.682863  | 3.658301 |
| C1 | 20.403236 | 3.096757   | 3.658301 |
| C1 | 21.029571 | -21.378452 | 3.658301 |
| C1 | 13.657201 | -8.598833  | 3.658301 |
| C1 | 6.284830  | 4.180786   | 3.658301 |
| C1 | 28.403360 | -8.598833  | 3.658301 |
| C1 | 21.030988 | 4.180786   | 3.658301 |
| C1 | 21.701428 | -20.213794 | 3.658301 |
| C1 | 14.329057 | -7.434175  | 3.658301 |
| C1 | 6.956685  | 5.345446   | 3.658301 |
| C1 | 29.075214 | -7.434175  | 3.658301 |
| C1 | 21.702842 | 5.345446   | 3.658301 |
| C1 | 22.330455 | -19.120037 | 3.658301 |
| C1 | 14.958085 | -6.340418  | 3.658301 |
| C1 | 7.585714  | 6.439201   | 3.658301 |
| C1 | 22.331872 | 6.439201   | 3.658301 |
| C1 | 16.129544 | -24.928898 | 3.658301 |
| C1 | 8.757328  | -12.149546 | 3.658301 |
| C1 | 1.384956  | 0.630073   | 3.658301 |
| C1 | 23.503484 | -12.149546 | 3.658301 |
| C1 | 16.131114 | 0.630073   | 3.658301 |
| C1 | 14.876902 | -24.927646 | 3.658301 |
| C1 | 7.504531  | -12.148025 | 3.658301 |
| C1 | 0.132160  | 0.631594   | 3.658301 |
| C1 | 22.250688 | -12.148025 | 3.658301 |
| C1 | 14.878317 | 0.631594   | 3.658301 |
| C1 | 28.279398 | -24.927377 | 3.658301 |
| C1 | 20.907027 | -12.147758 | 3.658301 |
| C1 | 13.534657 | 0.631861   | 3.658301 |

|    |            |            |          |
|----|------------|------------|----------|
| C1 | 28.280815  | 0.631861   | 3.658301 |
| C1 | 27.017059  | -24.928028 | 3.658301 |
| C1 | 19.644689  | -12.148409 | 3.658301 |
| C1 | 12.272317  | 0.631209   | 3.658301 |
| C1 | 27.018476  | 0.631209   | 3.658301 |
| C1 | -1.699386  | 13.408810  | 3.658301 |
| C1 | 13.045355  | -12.150429 | 3.658301 |
| C1 | 5.672985   | 0.629192   | 3.658301 |
| C1 | 13.046772  | 13.408810  | 3.658301 |
| C1 | 27.791512  | -12.150429 | 3.658301 |
| C1 | 20.419141  | 0.629192   | 3.658301 |
| C1 | 27.792928  | 13.408810  | 3.658301 |
| C1 | 18.255654  | -23.679894 | 3.658301 |
| C1 | 10.883285  | -10.900275 | 3.658301 |
| C1 | 3.510914   | 1.879344   | 3.658301 |
| C1 | 25.629441  | -10.900275 | 3.658301 |
| C1 | 18.257071  | 1.879344   | 3.658301 |
| C1 | 10.883176  | -13.400021 | 3.658301 |
| C1 | 3.510804   | -0.620401  | 3.658301 |
| C1 | -3.861566  | 12.159218  | 3.658301 |
| C1 | 25.629333  | -13.400021 | 3.658301 |
| C1 | 18.256961  | -0.620401  | 3.658301 |
| C1 | 10.884592  | 12.159218  | 3.658301 |
| C1 | 25.630751  | 12.159218  | 3.658301 |
| C1 | 17.535087  | -24.929613 | 3.658301 |
| C1 | 10.162717  | -12.149995 | 3.658301 |
| C1 | 2.790347   | 0.629625   | 3.658301 |
| C1 | 24.908874  | -12.149995 | 3.658301 |
| C1 | 17.536503  | 0.629625   | 3.658301 |
| C1 | 12.325091  | -13.400058 | 3.658301 |
| C1 | 4.952721   | -0.620440  | 3.658301 |
| C1 | -2.419650  | 12.159180  | 3.658301 |
| C1 | 27.071248  | -13.400058 | 3.658301 |
| C1 | 19.698877  | -0.620440  | 3.658301 |
| C1 | 12.326507  | 12.159180  | 3.658301 |
| C1 | 27.072665  | 12.159180  | 3.658301 |
| C1 | 19.697616  | -23.679932 | 3.658301 |
| C1 | 12.325245  | -10.900315 | 3.658301 |
| C1 | 4.952873   | 1.879306   | 3.658301 |
| C1 | 27.071402  | -10.900315 | 3.658301 |
| C1 | 19.699030  | 1.879306   | 3.658301 |
| C1 | 24.417503  | -24.930508 | 3.658301 |
| C1 | -4.578345  | 15.869048  | 3.658301 |
| C1 | 10.167813  | 15.869048  | 3.658301 |
| C1 | 24.913971  | 15.869048  | 3.658301 |
| C1 | -5.206619  | 16.952504  | 3.658301 |
| C1 | 9.539540   | 16.952504  | 3.658301 |
| C1 | 24.285695  | 16.952504  | 3.658301 |
| C1 | -5.879723  | 18.115872  | 3.658301 |
| C1 | 8.866433   | 18.115872  | 3.658301 |
| C1 | 23.612592  | 18.115872  | 3.658301 |
| C1 | -6.507701  | 19.209705  | 3.658301 |
| C1 | 8.238456   | 19.209705  | 3.658301 |
| C1 | 22.984613  | 19.209705  | 3.658301 |
| C1 | -11.950473 | 23.713383  | 3.658301 |
| C1 | 2.795685   | 23.713383  | 3.658301 |
| C1 | 17.541843  | 23.713383  | 3.658301 |
| C1 | -12.577267 | 22.628918  | 3.658301 |
| C1 | 2.168890   | 22.628918  | 3.658301 |
| C1 | 16.915049  | 22.628918  | 3.658301 |
| C1 | 1.495974   | 21.465487  | 3.658301 |
| C1 | 16.242130  | 21.465487  | 3.658301 |
| C1 | 0.866850   | 20.372075  | 3.658301 |
| C1 | 15.613008  | 20.372075  | 3.658301 |
| C1 | 3.548480   | 13.401791  | 3.658301 |

|    |            |            |          |
|----|------------|------------|----------|
| C1 | 18.294638  | 13.401791  | 3.658301 |
| C1 | -9.101736  | 23.713486  | 3.658301 |
| C1 | 5.644421   | 23.713486  | 3.658301 |
| C1 | 20.390580  | 23.713486  | 3.658301 |
| C1 | -8.473441  | 22.629888  | 3.658301 |
| C1 | 6.272717   | 22.629888  | 3.658301 |
| C1 | 21.018876  | 22.629888  | 3.658301 |
| C1 | -7.801802  | 21.465436  | 3.658301 |
| C1 | 6.944354   | 21.465436  | 3.658301 |
| C1 | 21.690511  | 21.465436  | 3.658301 |
| C1 | -7.172682  | 20.371845  | 3.658301 |
| C1 | 7.573475   | 20.371845  | 3.658301 |
| C1 | 22.319634  | 20.371845  | 3.658301 |
| C1 | -1.728730  | 15.868754  | 3.658301 |
| C1 | 13.017428  | 15.868754  | 3.658301 |
| C1 | 27.763585  | 15.868754  | 3.658301 |
| C1 | -1.100979  | 16.952786  | 3.658301 |
| C1 | 13.645179  | 16.952786  | 3.658301 |
| C1 | 28.391337  | 16.952786  | 3.658301 |
| C1 | -0.429123  | 18.117444  | 3.658301 |
| C1 | 14.317035  | 18.117444  | 3.658301 |
| C1 | 29.063191  | 18.117444  | 3.658301 |
| C1 | 0.199906   | 19.211201  | 3.658301 |
| C1 | 14.946063  | 19.211201  | 3.658301 |
| C1 | -6.001006  | 13.402340  | 3.658301 |
| C1 | 8.745150   | 13.402340  | 3.658301 |
| C1 | 23.491308  | 13.402340  | 3.658301 |
| C1 | -7.253648  | 13.403591  | 3.658301 |
| C1 | 7.492508   | 13.403591  | 3.658301 |
| C1 | 22.238667  | 13.403591  | 3.658301 |
| C1 | 6.148847   | 13.403861  | 3.658301 |
| C1 | 20.895005  | 13.403861  | 3.658301 |
| C1 | 4.886509   | 13.403208  | 3.658301 |
| C1 | 19.632668  | 13.403208  | 3.658301 |
| C1 | -3.874896  | 14.651343  | 3.658301 |
| C1 | 10.871263  | 14.651343  | 3.658301 |
| C1 | 25.617421  | 14.651343  | 3.658301 |
| C1 | -11.247374 | 24.931217  | 3.658301 |
| C1 | 3.498782   | 24.931217  | 3.658301 |
| C1 | 18.244941  | 24.931217  | 3.658301 |
| C1 | -4.595463  | 13.401625  | 3.658301 |
| C1 | 10.150695  | 13.401625  | 3.658301 |
| C1 | 24.896853  | 13.401625  | 3.658301 |
| C1 | -9.805459  | 24.931179  | 3.658301 |
| C1 | 4.940698   | 24.931179  | 3.658301 |
| C1 | 19.686857  | 24.931179  | 3.658301 |
| C1 | -2.432934  | 14.651305  | 3.658301 |
| C1 | 12.313223  | 14.651305  | 3.658301 |
| C1 | 27.059379  | 14.651305  | 3.658301 |
| C1 | 2.286954   | 13.400728  | 3.658301 |
| C1 | 17.033112  | 13.400728  | 3.658301 |
| C1 | 21.835995  | -24.923716 | 3.658301 |
| C1 | 23.088103  | -24.924097 | 3.658301 |
| C1 | 20.431164  | -24.923191 | 3.658301 |

## S.2. Cartesian coordinates of the new configuration (int structure) obtained from the MD analysis

|   |            |            |           |
|---|------------|------------|-----------|
| C | -15.236831 | -22.757506 | -0.482757 |
| C | -22.557851 | -9.948914  | -0.597412 |
| C | -0.504269  | -22.818753 | 0.147266  |
| C | -7.825289  | -10.010161 | 0.032612  |
| C | -15.146310 | 2.798429   | -0.082043 |
| C | -15.861280 | -21.671833 | -0.492643 |

|   |            |            |           |
|---|------------|------------|-----------|
| C | -23.182301 | -8.863241  | -0.607297 |
| C | -1.128718  | -21.733080 | 0.137381  |
| C | -8.449739  | -8.924488  | 0.022726  |
| C | -15.770760 | 3.884104   | -0.091929 |
| C | 12.936020  | -20.627539 | 0.756920  |
| C | 5.614999   | -7.818947  | 0.642265  |
| C | -1.706020  | 4.989644   | 0.527611  |
| C | -16.529109 | -20.505044 | -0.503127 |
| C | -23.850129 | -7.696452  | -0.617781 |
| C | -1.796547  | -20.566291 | 0.126897  |
| C | -9.117568  | -7.757699  | 0.012242  |
| C | -16.438587 | 5.050892   | -0.102413 |
| C | 12.310619  | -19.531869 | 0.747149  |
| C | 4.989598   | -6.723278  | 0.632494  |
| C | -2.331423  | 6.085315   | 0.517839  |
| C | -17.154510 | -19.409374 | -0.512898 |
| C | -24.475530 | -6.600783  | -0.627553 |
| C | -2.421949  | -19.470621 | 0.117125  |
| C | -9.742969  | -6.662030  | 0.002471  |
| C | -17.063989 | 6.146562   | -0.112184 |
| C | -22.574985 | -14.883038 | -0.674763 |
| C | -7.842420  | -14.944285 | -0.044740 |
| C | -15.163439 | -2.135695  | -0.159395 |
| C | -22.484461 | 10.672898  | -0.274049 |
| C | 6.890145   | -15.005533 | 0.585284  |
| C | -0.430875  | -2.196942  | 0.470629  |
| C | -7.751896  | 10.611651  | 0.355974  |
| C | -23.206792 | -15.963807 | -0.718605 |
| C | -8.474227  | -16.025055 | -0.088582 |
| C | -15.795247 | -3.216464  | -0.203236 |
| C | -23.116267 | 9.592130   | -0.317891 |
| C | 6.258338   | -16.086302 | 0.541442  |
| C | -1.062682  | -3.277711  | 0.426787  |
| C | -8.383704  | 9.530883   | 0.312132  |
| C | -23.882911 | -17.125036 | -0.765594 |
| C | -9.150346  | -17.186284 | -0.135571 |
| C | -16.471365 | -4.377693  | -0.250225 |
| C | -23.792386 | 8.430901   | -0.364880 |
| C | 5.582219   | -17.247531 | 0.494453  |
| C | -1.738801  | -4.438940  | 0.379798  |
| C | -9.059822  | 8.369654   | 0.265143  |
| C | -24.515916 | -18.215589 | -0.809639 |
| C | -9.783349  | -18.276836 | -0.179616 |
| C | -17.104371 | -5.468243  | -0.294270 |
| C | -24.425390 | 7.340348   | -0.408925 |
| C | 4.949215   | -18.338083 | 0.450408  |
| C | -2.371806  | -5.529491  | 0.335753  |
| C | -9.692825  | 7.279100   | 0.221098  |
| C | -25.709980 | -25.180917 | -0.968938 |
| C | -10.977416 | -25.242164 | -0.338915 |
| C | -18.298262 | -12.433878 | -0.453567 |
| C | -25.619280 | 0.374711   | -0.568221 |
| C | 3.755151   | -25.303412 | 0.291109  |
| C | -3.565695  | -12.495125 | 0.176457  |
| C | -10.886713 | 0.313464   | 0.061802  |
| C | -17.046637 | -12.440269 | -0.400061 |
| C | -24.367656 | 0.368320   | -0.514715 |
| C | -2.314073  | -12.501517 | 0.229963  |
| C | -9.635091  | 0.307072   | 0.115308  |
| C | -15.704200 | -12.445914 | -0.342654 |
| C | -23.025219 | 0.362675   | -0.457308 |
| C | -15.613676 | 13.110020  | 0.058061  |
| C | -0.971635  | -12.507161 | 0.287370  |
| C | -8.292654  | 0.301427   | 0.172715  |
| C | -14.442977 | -12.450430 | -0.288707 |

C -21.763996 0.358158 -0.403362  
C -14.352452 13.105504 0.112007  
C 0.289588 -12.511678 0.341316  
C -7.031431 0.296910 0.226662  
C -19.728183 -14.895129 -0.553027  
C -27.049204 -2.086538 -0.667681  
C -4.995619 -14.956376 0.076997  
C -12.316639 -2.147785 -0.037658  
C -19.637660 10.660807 -0.152313  
C -19.105713 -15.981841 -0.543242  
C -26.426733 -3.173248 -0.657897  
C -4.373148 -16.043088 0.086782  
C -11.694170 -3.234495 -0.027873  
C -19.015189 9.574096 -0.142528  
C -18.438480 -17.148334 -0.532779  
C -25.759500 -4.339741 -0.647434  
C -3.705915 -17.209582 0.097245  
C -11.026936 -4.400989 -0.017410  
C -18.347956 8.407602 -0.132065  
C -17.815071 -18.244865 -0.523106  
C -25.136091 -5.436272 -0.637761  
C -3.082505 -18.306112 0.106917  
C -10.403527 -5.497519 -0.007737  
C -17.724546 7.311072 -0.122392  
C -27.123433 -22.707374 -0.991065  
C -12.390867 -22.768621 -0.361041  
C -19.711888 -9.960031 -0.475696  
C -27.032909 2.848563 -0.590350  
C 2.341698 -22.829869 0.268982  
C -4.979322 -10.021278 0.154328  
C -12.300343 2.787316 0.039673  
C -26.494414 -21.625047 -0.947318  
C -11.761848 -21.686295 -0.317295  
C -19.082869 -8.877703 -0.431949  
C -26.403889 3.930888 -0.546604  
C 2.970718 -21.747542 0.312729  
C -4.350303 -8.938950 0.198074  
C -11.671323 3.869641 0.083420  
C -25.818789 -20.464034 -0.900354  
C -11.086223 -20.525282 -0.270330  
C -18.407243 -7.716691 -0.384985  
C -25.728263 5.091902 -0.499639  
C 3.646342 -20.586529 0.359693  
C -3.674679 -7.777938 0.245039  
C -10.995699 5.030655 0.130384  
C -25.186667 -19.373350 -0.856344  
C -10.454102 -19.434598 -0.226321  
C -17.775123 -6.626006 -0.340976  
C -25.096144 6.182586 -0.455630  
C 4.278463 -19.495845 0.403703  
C -3.042557 -6.687253 0.289048  
C -10.363578 6.121339 0.174393  
C -16.664702 -25.218520 -0.582126  
C -23.985904 -12.409609 -0.696783  
C -1.932137 -25.279768 0.047898  
C -9.253340 -12.470856 -0.066760  
C -16.574360 0.337735 -0.181414  
C 12.800430 -25.341015 0.677921  
C 5.479227 -12.532104 0.563264  
C -1.841793 0.276487 0.448609  
C -17.915838 -25.212105 -0.635610  
C -25.236858 -12.403513 -0.750265  
C -3.183273 -25.273353 -0.005587  
C -10.504294 -12.464761 -0.120242  
C -17.825315 0.343831 -0.234896

|   |            |            |           |
|---|------------|------------|-----------|
| C | 11.549294  | -25.334600 | 0.624437  |
| C | 4.228273   | -12.526008 | 0.509782  |
| C | -3.092748  | 0.282584   | 0.395127  |
| C | -19.257377 | -25.206566 | -0.692981 |
| C | -26.578398 | -12.397974 | -0.807635 |
| C | -4.524814  | -25.267813 | -0.062957 |
| C | -11.845834 | -12.459222 | -0.177612 |
| C | -19.166854 | 0.349369   | -0.292267 |
| C | 10.207753  | -25.329061 | 0.567066  |
| C | 2.886732   | -12.520469 | 0.452412  |
| C | -4.434287  | 0.288122   | 0.337757  |
| C | -20.517729 | -25.202029 | -0.746889 |
| C | -5.785163  | -25.263277 | -0.116866 |
| C | -13.106184 | -12.454685 | -0.231520 |
| C | -20.427205 | 0.353908   | -0.346175 |
| C | 8.947401   | -25.324524 | 0.513158  |
| C | 1.626381   | -12.515932 | 0.398503  |
| C | -5.694640  | 0.292661   | 0.283848  |
| C | -27.113935 | -25.175080 | -1.028977 |
| C | -12.381369 | -25.236327 | -0.398953 |
| C | -19.702330 | -12.427840 | -0.513607 |
| C | -27.023352 | 0.380754   | -0.628262 |
| C | 2.351196   | -25.297575 | 0.231070  |
| C | -4.969765  | -12.489087 | 0.116416  |
| C | -12.290786 | 0.319507   | 0.001762  |
| C | -14.537666 | -23.977889 | -0.471763 |
| C | -21.858687 | -11.169297 | -0.586418 |
| C | 0.194899   | -24.039137 | 0.158260  |
| C | -7.126121  | -11.230545 | 0.043606  |
| C | -14.447142 | 1.578046   | -0.071049 |
| C | -21.867164 | -13.668709 | -0.625592 |
| C | -7.134599  | -13.729956 | 0.004431  |
| C | -14.455619 | -0.921363  | -0.110223 |
| C | -21.776640 | 11.887227  | -0.224878 |
| C | 7.597965   | -13.791204 | 0.634455  |
| C | 0.276945   | -0.982611  | 0.519800  |
| C | -7.044075  | 11.825980  | 0.405145  |
| C | -15.261513 | -25.224354 | -0.522120 |
| C | -22.582468 | -12.415875 | -0.636773 |
| C | -0.528948  | -25.285601 | 0.107904  |
| C | -7.849905  | -12.477123 | -0.006750 |
| C | -15.170923 | 0.331466   | -0.121405 |
| C | 14.203618  | -25.346849 | 0.737927  |
| C | 6.882662   | -12.538370 | 0.623274  |
| C | -0.438356  | 0.270219   | 0.508619  |
| C | -20.426488 | -13.674506 | -0.563980 |
| C | -5.693923  | -13.735754 | 0.066043  |
| C | -13.014944 | -0.927161  | -0.048611 |
| C | -20.335963 | 11.881430  | -0.163266 |
| C | -13.097064 | -23.983687 | -0.410154 |
| C | -20.418084 | -11.175094 | -0.524809 |
| C | 1.635502   | -24.044935 | 0.219869  |
| C | -5.685519  | -11.236342 | 0.105215  |
| C | -13.006539 | 1.572249   | -0.009440 |
| C | -24.458183 | -25.187616 | -0.915429 |
| C | -9.725617  | -25.248863 | -0.285406 |
| C | 5.006949   | -25.310110 | 0.344618  |
| C | -22.480783 | 15.599459  | -0.197391 |
| C | -23.105232 | 16.685132  | -0.207277 |
| C | -9.040493  | 17.790674  | 0.412263  |
| C | -23.773060 | 17.851921  | -0.217761 |
| C | -9.665894  | 18.886344  | 0.402491  |
| C | -24.398462 | 18.947591  | -0.227532 |
| C | -15.086368 | 23.412680  | 0.240626  |
| C | -15.718175 | 22.331910  | 0.196784  |

|   |            |            |           |
|---|------------|------------|-----------|
| C | -16.394294 | 21.170681  | 0.149795  |
| C | -17.027298 | 20.080129  | 0.105750  |
| C | -18.221362 | 13.114801  | -0.053549 |
| C | -26.972132 | 23.461836  | -0.267661 |
| C | -26.349661 | 22.375124  | -0.257876 |
| C | -25.682428 | 21.208631  | -0.247413 |
| C | -25.059018 | 20.112100  | -0.237740 |
| C | -19.634815 | 15.588344  | -0.075675 |
| C | -19.005796 | 16.670670  | -0.031929 |
| C | -18.330171 | 17.831683  | 0.015036  |
| C | -17.698050 | 18.922367  | 0.059045  |
| C | -23.908650 | 13.138445  | -0.296760 |
| C | -9.176083  | 13.077197  | 0.333264  |
| C | -25.159787 | 13.144860  | -0.350245 |
| C | -10.427220 | 13.083612  | 0.279779  |
| C | -26.501327 | 13.150399  | -0.407615 |
| C | -11.768760 | 13.089152  | 0.222409  |
| C | -13.029112 | 13.093688  | 0.168500  |
| C | -19.625317 | 13.120638  | -0.113587 |
| C | -21.781615 | 14.379076  | -0.186397 |
| C | -14.378548 | 24.627009  | 0.289797  |
| C | -22.505462 | 13.132611  | -0.236754 |
| C | -7.772895  | 13.071364  | 0.393270  |
| C | -20.341011 | 14.373278  | -0.124788 |
| C | -16.969564 | 13.108102  | -0.000040 |
| C | -23.102295 | -25.186460 | -0.857341 |
| C | -8.369729  | -25.247708 | -0.227317 |
| C | 6.362835   | -25.308955 | 0.402706  |
| C | -21.841073 | -25.190977 | -0.803395 |
| C | -7.108507  | -25.252224 | -0.173371 |
| C | 7.624059   | -25.313471 | 0.456653  |
| C | 14.250905  | -22.880095 | 0.778257  |
| C | 6.929885   | -10.071503 | 0.663602  |
| C | -0.391136  | 2.737088   | 0.548947  |
| C | 28.983471  | -22.941342 | 1.408280  |
| C | 21.662452  | -10.132750 | 1.293626  |
| C | 14.341432  | 2.675841   | 1.178971  |
| C | 29.073993  | 2.614593   | 1.808994  |
| C | 28.359022  | -21.855669 | 1.398395  |
| C | 21.038002  | -9.047077  | 1.283740  |
| C | 13.716981  | 3.761515   | 1.169085  |
| C | 28.449543  | 3.700267   | 1.799109  |
| C | 27.691194  | -20.688880 | 1.387911  |
| C | 20.370173  | -7.880288  | 1.273256  |
| C | 13.049154  | 4.928303   | 1.158601  |
| C | 27.781715  | 4.867055   | 1.788625  |
| C | 27.065793  | -19.593210 | 1.378139  |
| C | 19.744772  | -6.784619  | 1.263485  |
| C | 12.423751  | 6.023974   | 1.148830  |
| C | 27.156313  | 5.962726   | 1.778853  |
| C | 21.645318  | -15.066874 | 1.216274  |
| C | 14.324297  | -2.258283  | 1.101619  |
| C | 7.003277   | 10.550310  | 0.986964  |
| C | 29.056863  | -2.319531  | 1.731643  |
| C | 21.735841  | 10.489062  | 1.616988  |
| C | 21.013511  | -16.147644 | 1.172432  |
| C | 13.692491  | -3.339053  | 1.057777  |
| C | 6.371469   | 9.469541   | 0.943123  |
| C | 28.425056  | -3.400300  | 1.687801  |
| C | 21.104035  | 9.408294   | 1.573146  |
| C | 20.337391  | -17.308873 | 1.125443  |
| C | 13.016371  | -4.500282  | 1.010788  |
| C | 5.695350   | 8.308312   | 0.896134  |
| C | 27.748937  | -4.561529  | 1.640812  |
| C | 20.427916  | 8.247065   | 1.526157  |

|   |           |            |          |
|---|-----------|------------|----------|
| C | 19.704387 | -18.399425 | 1.081398 |
| C | 12.383366 | -5.590832  | 0.966743 |
| C | 5.062346  | 7.217759   | 0.852089 |
| C | 27.115932 | -5.652079  | 1.596767 |
| C | 19.794912 | 7.156512   | 1.482112 |
| C | 18.510322 | -25.364753 | 0.922099 |
| C | 11.189476 | -12.556467 | 0.807447 |
| C | 3.868457  | 0.252122   | 0.692793 |
| C | 25.922041 | -12.617714 | 1.437471 |
| C | 18.601022 | 0.190875   | 1.322816 |
| C | 12.441099 | -12.562858 | 0.860953 |
| C | 5.120081  | 0.245731   | 0.746299 |
| C | 27.173665 | -12.624105 | 1.490977 |
| C | 19.852646 | 0.184484   | 1.376322 |
| C | -0.858503 | 13.048679  | 0.689051 |
| C | 13.783538 | -12.568503 | 0.918360 |
| C | 6.462519  | 0.240086   | 0.803706 |
| C | 13.874063 | 12.987432  | 1.319074 |
| C | 28.516102 | -12.629750 | 1.548384 |
| C | 21.195084 | 0.178839   | 1.433729 |
| C | 28.606627 | 12.926184  | 1.949098 |
| C | 0.402719  | 13.044163  | 0.742997 |
| C | 15.044759 | -12.573019 | 0.972306 |
| C | 7.723741  | 0.235569   | 0.857652 |
| C | 15.135285 | 12.982915  | 1.373021 |
| C | 29.777325 | -12.634267 | 1.602330 |
| C | 22.456307 | 0.174321   | 1.487675 |
| C | 29.867851 | 12.921668  | 2.003044 |
| C | 9.759554  | -15.017718 | 0.707987 |
| C | 2.438534  | -2.209127  | 0.593332 |
| C | -4.882488 | 10.599466  | 0.478678 |
| C | 24.492120 | -15.078965 | 1.338011 |
| C | 17.171099 | -2.270374  | 1.223356 |
| C | 9.850078  | 10.538219  | 1.108701 |
| C | 24.582642 | 10.476971  | 1.738725 |
| C | 10.382025 | -16.104429 | 0.717772 |
| C | 3.061003  | -3.295837  | 0.603117 |
| C | -4.260016 | 9.512754   | 0.488462 |
| C | 25.114590 | -16.165677 | 1.347795 |
| C | 17.793569 | -3.357084  | 1.233141 |
| C | 10.472549 | 9.451507   | 1.118486 |
| C | 25.205113 | 9.390260   | 1.748509 |
| C | 11.049258 | -17.270923 | 0.728235 |
| C | 3.728237  | -4.462330  | 0.613580 |
| C | -3.592782 | 8.346261   | 0.498926 |
| C | 25.781823 | -17.332171 | 1.358259 |
| C | 18.460802 | -4.523578  | 1.243604 |
| C | 11.139782 | 8.285013   | 1.128949 |
| C | 25.872346 | 8.223766   | 1.758973 |
| C | 11.672239 | -18.367452 | 0.737889 |
| C | 4.351219  | -5.558859  | 0.623235 |
| C | -2.969801 | 7.249732   | 0.508580 |
| C | 26.405232 | -18.428701 | 1.367931 |
| C | 19.084211 | -5.620108  | 1.253276 |
| C | 11.763190 | 7.188483   | 1.138622 |
| C | 26.495756 | 7.127235   | 1.768645 |
| C | 17.096869 | -22.891210 | 0.899973 |
| C | 9.775850  | -10.082619 | 0.785318 |
| C | 2.454828  | 2.725975   | 0.670663 |
| C | 24.508414 | -10.143867 | 1.415342 |
| C | 17.187394 | 2.664727   | 1.300687 |
| C | 17.725888 | -21.808883 | 0.943719 |
| C | 10.404869 | -9.000292  | 0.829065 |
| C | 3.083848  | 3.808299   | 0.714410 |
| C | 25.137434 | -9.061539  | 1.459088 |

|   |           |            |          |
|---|-----------|------------|----------|
| C | 17.816414 | 3.747052   | 1.344433 |
| C | 18.401514 | -20.647870 | 0.990684 |
| C | 11.080494 | -7.839280  | 0.876029 |
| C | 3.759473  | 4.969313   | 0.761374 |
| C | 25.813060 | -7.900527  | 1.506053 |
| C | 18.492039 | 4.908066   | 1.391398 |
| C | 19.033635 | -19.557186 | 1.034693 |
| C | 11.712615 | -6.748595  | 0.920038 |
| C | 4.391594  | 6.059997   | 0.805383 |
| C | 26.445179 | -6.809842  | 1.550062 |
| C | 19.124159 | 5.998750   | 1.435407 |
| C | 27.555601 | -25.402357 | 1.308912 |
| C | 20.234399 | -12.593445 | 1.194254 |
| C | 12.913378 | 0.215146   | 1.079599 |
| C | 27.645943 | 0.153898   | 1.709623 |
| C | 26.304464 | -25.395941 | 1.255427 |
| C | 18.983445 | -12.587350 | 1.140772 |
| C | 11.662424 | 0.221242   | 1.026117 |
| C | 26.394988 | 0.159995   | 1.656141 |
| C | 24.962925 | -25.390402 | 1.198057 |
| C | 17.641904 | -12.581810 | 1.083402 |
| C | 10.320884 | 0.226780   | 0.968747 |
| C | 25.053448 | 0.165533   | 1.598771 |
| C | 23.702573 | -25.385866 | 1.144148 |
| C | 16.381553 | -12.577274 | 1.029493 |
| C | 9.060532  | 0.231319   | 0.914839 |
| C | 31.114118 | -12.638521 | 1.659517 |
| C | 23.793098 | 0.170072   | 1.544862 |
| C | 17.106367 | -25.358916 | 0.862061 |
| C | 9.785406  | -12.550429 | 0.747407 |
| C | 2.464386  | 0.258165   | 0.632752 |
| C | 24.517972 | -12.611676 | 1.377430 |
| C | 17.196950 | 0.196918   | 1.262776 |
| C | 14.950071 | -24.100478 | 0.789251 |
| C | 7.629051  | -11.291886 | 0.674596 |
| C | 0.308031  | 1.516705   | 0.559941 |
| C | 29.682636 | -24.161725 | 1.419274 |
| C | 22.361616 | -11.353134 | 1.304619 |
| C | 15.040596 | 1.455457   | 1.189965 |
| C | 29.773161 | 1.394210   | 1.819988 |
| C | 22.353138 | -13.852545 | 1.265445 |
| C | 15.032118 | -1.043952  | 1.150790 |
| C | 7.711098  | 11.764639  | 1.036136 |
| C | 29.764683 | -1.105200  | 1.780814 |
| C | 22.443663 | 11.703391  | 1.666159 |
| C | 28.958789 | -25.408190 | 1.368918 |
| C | 21.637834 | -12.599712 | 1.254264 |
| C | 14.316816 | 0.208877   | 1.139609 |
| C | 29.049379 | 0.147630   | 1.769633 |
| C | 9.061249  | -13.797095 | 0.697034 |
| C | 1.740228  | -0.988502  | 0.582379 |
| C | -5.580791 | 11.820089  | 0.467724 |
| C | 23.793815 | -13.858342 | 1.327057 |
| C | 16.472794 | -1.049750  | 1.212403 |
| C | 9.151773  | 11.758841  | 1.097748 |
| C | 31.205359 | -1.110997  | 1.842426 |
| C | 23.884339 | 11.697594  | 1.727771 |
| C | 16.390673 | -24.106276 | 0.850860 |
| C | 9.069653  | -11.297683 | 0.736205 |
| C | 1.748633  | 1.510908   | 0.621550 |
| C | 31.123239 | -24.167523 | 1.480883 |
| C | 23.802218 | -11.358931 | 1.366228 |
| C | 16.481198 | 1.449660   | 1.251574 |
| C | 31.213763 | 1.388413   | 1.881597 |
| C | 13.626456 | -21.794422 | 0.768371 |

|   |            |            |          |
|---|------------|------------|----------|
| C | 6.305435   | -8.985830  | 0.653716 |
| C | -1.015586  | 3.822762   | 0.539062 |
| C | 19.762120  | -25.371452 | 0.975608 |
| C | -7.725609  | 15.538118  | 0.433599 |
| C | 7.006958   | 15.476870  | 1.063623 |
| C | 21.739520  | 15.415623  | 1.693646 |
| C | 6.382509   | 16.562543  | 1.053737 |
| C | 21.115071  | 16.501296  | 1.683760 |
| C | 5.714681   | 17.729332  | 1.043253 |
| C | 20.447242  | 17.668085  | 1.673276 |
| C | 5.089279   | 18.825002  | 1.033482 |
| C | 19.821840  | 18.763755  | 1.663505 |
| C | -0.331195  | 23.351338  | 0.871616 |
| C | 14.401369  | 23.290091  | 1.501640 |
| C | 29.133934  | 23.228843  | 2.131663 |
| C | -0.963002  | 22.270569  | 0.827774 |
| C | 13.769562  | 22.209321  | 1.457798 |
| C | 28.502127  | 22.148074  | 2.087821 |
| C | -1.639122  | 21.109340  | 0.780785 |
| C | 13.093444  | 21.048092  | 1.410809 |
| C | 27.826008  | 20.986845  | 2.040832 |
| C | -2.272126  | 20.018788  | 0.736740 |
| C | 12.460440  | 19.957540  | 1.366764 |
| C | 27.193004  | 19.896293  | 1.996788 |
| C | -3.466191  | 13.053460  | 0.577442 |
| C | 11.266374  | 12.992212  | 1.207465 |
| C | 25.998940  | 12.930965  | 1.837489 |
| C | -12.216959 | 23.400495  | 0.363329 |
| C | 2.515606   | 23.339247  | 0.993353 |
| C | 17.248170  | 23.278000  | 1.623376 |
| C | -11.594488 | 22.313783  | 0.373114 |
| C | 3.138076   | 22.252536  | 1.003138 |
| C | 17.870641  | 22.191288  | 1.633161 |
| C | -10.927255 | 21.147289  | 0.383577 |
| C | 3.805309   | 21.086042  | 1.013601 |
| C | 18.537874  | 21.024795  | 1.643624 |
| C | -10.304274 | 20.050761  | 0.393232 |
| C | 4.428718   | 19.989511  | 1.023273 |
| C | 19.161284  | 19.928264  | 1.653297 |
| C | -4.879644  | 15.527002  | 0.555315 |
| C | 9.852922   | 15.465755  | 1.185339 |
| C | 24.585488  | 15.404507  | 1.815362 |
| C | -4.250625  | 16.609329  | 0.599062 |
| C | 10.481941  | 16.548082  | 1.229085 |
| C | 25.214507  | 16.486834  | 1.859109 |
| C | -3.574999  | 17.770342  | 0.646026 |
| C | 11.157566  | 17.709095  | 1.276050 |
| C | 25.890131  | 17.647847  | 1.906073 |
| C | -2.942878  | 18.861026  | 0.690035 |
| C | 11.789687  | 18.799779  | 1.320059 |
| C | 26.522253  | 18.738531  | 1.950082 |
| C | 5.579088   | 13.015856  | 0.964254 |
| C | 20.311652  | 12.954608  | 1.594277 |
| C | 4.327951   | 13.022271  | 0.910769 |
| C | 19.060516  | 12.961024  | 1.540793 |
| C | 2.986412   | 13.027810  | 0.853399 |
| C | 17.718976  | 12.966563  | 1.483422 |
| C | 1.726060   | 13.032347  | 0.799490 |
| C | 16.458626  | 12.971099  | 1.429514 |
| C | 31.191191  | 12.909852  | 2.059537 |
| C | -4.870146  | 13.059296  | 0.517403 |
| C | 9.862420   | 12.998049  | 1.147426 |
| C | 24.594986  | 12.936801  | 1.777450 |
| C | -7.026442  | 14.317734  | 0.444593 |
| C | 7.706123   | 14.256487  | 1.074617 |

|    |            |            |          |
|----|------------|------------|----------|
| C  | 22.438688  | 14.195240  | 1.704640 |
| C  | 0.376625   | 24.565667  | 0.920787 |
| C  | 15.109190  | 24.504420  | 1.550811 |
| C  | 29.841755  | 24.443172  | 2.180834 |
| C  | 6.982276   | 13.010022  | 1.024260 |
| C  | 21.714841  | 12.948775  | 1.654283 |
| C  | -12.915264 | 24.621117  | 0.352376 |
| C  | 1.817301   | 24.559870  | 0.982400 |
| C  | 16.549866  | 24.498623  | 1.612423 |
| C  | -5.585840  | 14.311936  | 0.506202 |
| C  | 9.146726   | 14.250689  | 1.136225 |
| C  | 23.879291  | 14.189442  | 1.766249 |
| C  | -8.350058  | 16.623791  | 0.423713 |
| C  | -2.214393  | 13.046761  | 0.630950 |
| C  | 12.518172  | 12.985513  | 1.260974 |
| C  | 27.250738  | 12.924266  | 1.890997 |
| C  | 21.118008  | -25.370296 | 1.033697 |
| C  | 22.379230  | -25.374813 | 1.087643 |
| C  | 31.305038  | 24.437281  | 2.243413 |
| C1 | -28.426529 | -22.051479 | 2.599497 |
| C1 | -13.694036 | -22.116672 | 3.230838 |
| C1 | -21.011021 | -9.305911  | 3.101641 |
| C1 | -28.328004 | 3.504848   | 2.972445 |
| C1 | 1.038455   | -22.181864 | 3.862179 |
| C1 | -6.278528  | -9.371103  | 3.732982 |
| C1 | -13.595513 | 3.439655   | 3.603786 |
| C1 | -29.050104 | -20.965369 | 2.588405 |
| C1 | -14.317612 | -21.030561 | 3.219746 |
| C1 | -21.634596 | -8.219801  | 3.090549 |
| C1 | -28.951580 | 4.590957   | 2.961353 |
| C1 | 0.414879   | -21.095753 | 3.851086 |
| C1 | -6.902106  | -8.284994  | 3.721890 |
| C1 | -14.219089 | 4.525765   | 3.592693 |
| C1 | -29.718165 | -19.799158 | 2.576559 |
| C1 | -14.985674 | -19.864351 | 3.207900 |
| C1 | -22.302658 | -7.053590  | 3.078703 |
| C1 | -29.619643 | 5.757170   | 2.949507 |
| C1 | -0.253181  | -19.929543 | 3.839241 |
| C1 | -7.570166  | -7.118782  | 3.710044 |
| C1 | -14.887150 | 5.691977   | 3.580848 |
| C1 | -30.341406 | -18.702672 | 2.565631 |
| C1 | -15.608914 | -18.767865 | 3.196972 |
| C1 | -22.925898 | -5.957106  | 3.067775 |
| C1 | -30.242883 | 6.853655   | 2.938579 |
| C1 | -0.876422  | -18.833057 | 3.828312 |
| C1 | -8.193406  | -6.022298  | 3.699116 |
| C1 | -15.510390 | 6.788462   | 3.569919 |
| C1 | -21.029529 | -14.240636 | 3.029650 |
| C1 | -28.346513 | -1.429876  | 2.900454 |
| C1 | -6.297038  | -14.305828 | 3.660991 |
| C1 | -13.614022 | -1.495069  | 3.531794 |
| C1 | -20.931005 | 11.315690  | 3.402598 |
| C1 | -21.659863 | -15.322208 | 2.986993 |
| C1 | -28.976848 | -2.511447  | 2.857797 |
| C1 | -6.927371  | -15.387400 | 3.618334 |
| C1 | -14.244355 | -2.576639  | 3.489138 |
| C1 | -21.561340 | 10.234119  | 3.359941 |
| C1 | -22.336577 | -16.482532 | 2.941210 |
| C1 | -29.653561 | -3.671773  | 2.812013 |
| C1 | -7.604086  | -16.547724 | 3.572550 |
| C1 | -14.921070 | -3.736965  | 3.443354 |
| C1 | -22.238055 | 9.073796   | 3.314157 |
| C1 | 7.128408   | -16.612916 | 4.203891 |
| C1 | -0.188577  | -3.802158  | 4.074694 |
| C1 | -7.505561  | 9.008604   | 3.945498 |

|    |            |            |          |
|----|------------|------------|----------|
| C1 | -22.969272 | -17.573038 | 2.898323 |
| C1 | -30.286257 | -4.762277  | 2.769126 |
| C1 | -8.236780  | -17.638230 | 3.529663 |
| C1 | -15.553764 | -4.827470  | 3.400467 |
| C1 | -22.870749 | 7.983289   | 3.271270 |
| C1 | 6.495711   | -17.703423 | 4.161004 |
| C1 | -0.821274  | -4.892662  | 4.031807 |
| C1 | -8.138257  | 7.918097   | 3.902611 |
| C1 | -16.754007 | -11.792895 | 3.248460 |
| C1 | -24.070992 | 1.017865   | 3.119264 |
| C1 | -16.655482 | 13.763433  | 3.621408 |
| C1 | -2.021513  | -11.858088 | 3.879801 |
| C1 | -9.338497  | 0.952673   | 3.750604 |
| C1 | -30.235551 | -11.733618 | 2.670722 |
| C1 | -30.137026 | 13.822707  | 3.043669 |
| C1 | -15.503059 | -11.798810 | 3.302062 |
| C1 | -22.820042 | 1.011947   | 3.172866 |
| C1 | -15.404536 | 13.757515  | 3.675010 |
| C1 | -0.770569  | -11.864002 | 3.933403 |
| C1 | -8.087550  | 0.946754   | 3.804206 |
| C1 | -28.893955 | -11.739111 | 2.728220 |
| C1 | -14.161463 | -11.804304 | 3.359561 |
| C1 | -21.478448 | 1.006457   | 3.230365 |
| C1 | 0.571028   | -11.869496 | 3.990902 |
| C1 | -6.745957  | 0.941265   | 3.861705 |
| C1 | -20.316610 | -24.554384 | 2.911443 |
| C1 | -27.633595 | -11.743624 | 2.782247 |
| C1 | -5.584118  | -24.619577 | 3.542784 |
| C1 | -12.901102 | -11.808816 | 3.413587 |
| C1 | -20.218085 | 1.001941   | 3.284391 |
| C1 | 9.148374   | -24.684769 | 4.174124 |
| C1 | 1.831388   | -11.874008 | 4.044928 |
| C1 | -5.485594  | 0.936748   | 3.915731 |
| C1 | -18.183433 | -14.253128 | 3.151617 |
| C1 | -25.500416 | -1.442370  | 3.022421 |
| C1 | -3.450940  | -14.318321 | 3.782958 |
| C1 | -10.767925 | -1.507562  | 3.653761 |
| C1 | -18.084909 | 11.303199  | 3.524565 |
| C1 | -17.559836 | -15.339380 | 3.162708 |
| C1 | -24.876820 | -2.528619  | 3.033512 |
| C1 | -2.827343  | -15.404572 | 3.794049 |
| C1 | -10.144329 | -2.593811  | 3.664853 |
| C1 | -17.461312 | 10.216947  | 3.535656 |
| C1 | -16.893246 | -16.506670 | 3.174475 |
| C1 | -24.210230 | -3.695910  | 3.045279 |
| C1 | -2.160754  | -16.571862 | 3.805816 |
| C1 | -9.477737  | -3.761102  | 3.676620 |
| C1 | -16.794722 | 9.049656   | 3.547423 |
| C1 | -31.001354 | -17.537725 | 2.554116 |
| C1 | -16.268862 | -17.602917 | 3.185456 |
| C1 | -23.585847 | -4.792158  | 3.056260 |
| C1 | -30.902830 | 8.018600   | 2.927063 |
| C1 | -1.536369  | -17.668109 | 3.816797 |
| C1 | -8.853353  | -4.857350  | 3.687600 |
| C1 | -16.170337 | 7.953408   | 3.558404 |
| C1 | -25.579557 | -22.064371 | 2.721496 |
| C1 | -10.847064 | -22.129564 | 3.352837 |
| C1 | -18.164048 | -9.318804  | 3.223640 |
| C1 | -25.481033 | 3.491957   | 3.094444 |
| C1 | 3.885427   | -22.194756 | 3.984177 |
| C1 | -3.431557  | -9.383996  | 3.854981 |
| C1 | -10.748542 | 3.426764   | 3.725784 |
| C1 | -24.948268 | -20.983239 | 2.764188 |
| C1 | -10.215775 | -21.048431 | 3.395528 |
| C1 | -17.532759 | -8.237671  | 3.266332 |

|    |            |            |          |
|----|------------|------------|----------|
| C1 | -24.849743 | 4.573088   | 3.137135 |
| C1 | 4.516716   | -21.113623 | 4.026869 |
| C1 | -2.800268  | -8.302864  | 3.897672 |
| C1 | -10.117252 | 4.507896   | 3.768476 |
| C1 | -24.272610 | -19.821683 | 2.809944 |
| C1 | -9.540118  | -19.886876 | 3.441284 |
| C1 | -16.857102 | -7.076116  | 3.312088 |
| C1 | -24.174087 | 5.734645   | 3.182891 |
| C1 | 5.192372   | -19.952068 | 4.072625 |
| C1 | -2.124611  | -7.141308  | 3.943428 |
| C1 | -9.441596  | 5.669452   | 3.814232 |
| C1 | -23.640009 | -18.730832 | 2.852832 |
| C1 | -30.956993 | -5.920072  | 2.723635 |
| C1 | -8.907516  | -18.796024 | 3.484173 |
| C1 | -16.224501 | -5.985264  | 3.354976 |
| C1 | -23.541484 | 6.825494   | 3.225780 |
| C1 | 5.824975   | -18.861216 | 4.115513 |
| C1 | -1.492009  | -6.050456  | 3.986317 |
| C1 | -8.808994  | 6.760302   | 3.857120 |
| C1 | -29.857244 | -24.511618 | 2.502600 |
| C1 | -15.124753 | -24.576811 | 3.133941 |
| C1 | -22.441584 | -11.766320 | 3.004747 |
| C1 | -29.758568 | 1.044441   | 2.875551 |
| C1 | -0.392260  | -24.642003 | 3.765282 |
| C1 | -7.709091  | -11.831512 | 3.636088 |
| C1 | -15.026076 | 0.979249   | 3.506891 |
| C1 | -31.108721 | -24.504829 | 2.448988 |
| C1 | -16.376229 | -24.570021 | 3.080329 |
| C1 | -23.693213 | -11.759260 | 2.951132 |
| C1 | -31.010197 | 1.051499   | 2.821936 |
| C1 | -1.643737  | -24.635213 | 3.711669 |
| C1 | -8.960721  | -11.824453 | 3.582473 |
| C1 | -16.277706 | 0.986307   | 3.453276 |
| C1 | -17.718644 | -24.563812 | 3.022805 |
| C1 | -25.035629 | -11.753052 | 2.893609 |
| C1 | -2.986152  | -24.629004 | 3.654146 |
| C1 | -10.303136 | -11.818244 | 3.524949 |
| C1 | -17.620119 | 0.992514   | 3.395753 |
| C1 | 11.746339  | -24.694196 | 4.285487 |
| C1 | 4.429354   | -11.883437 | 4.156290 |
| C1 | -2.887629  | 0.927322   | 4.027094 |
| C1 | -18.979815 | -24.558883 | 2.968750 |
| C1 | -26.296799 | -11.748123 | 2.839554 |
| C1 | -4.247322  | -24.624075 | 3.600091 |
| C1 | -11.564307 | -11.813315 | 3.470894 |
| C1 | -18.881291 | 0.997444   | 3.341698 |
| C1 | 10.485168  | -24.689267 | 4.231431 |
| C1 | 3.168184   | -11.878508 | 4.102235 |
| C1 | -4.148800  | 0.932252   | 3.973038 |
| C1 | -18.157533 | -11.786159 | 3.188322 |
| C1 | -25.474517 | 1.024602   | 3.059125 |
| C1 | -18.059009 | 13.770168  | 3.561269 |
| C1 | -3.425040  | -11.851351 | 3.819662 |
| C1 | -10.742025 | 0.959410   | 3.690466 |
| C1 | -27.728358 | -23.272157 | 2.611849 |
| C1 | -12.995866 | -23.337349 | 3.243190 |
| C1 | -20.312850 | -10.526589 | 3.113994 |
| C1 | -27.629835 | 2.284170   | 2.984797 |
| C1 | 1.736627   | -23.402541 | 3.874531 |
| C1 | -5.580358  | -10.591782 | 3.745334 |
| C1 | -12.897342 | 2.218978   | 3.616138 |
| C1 | -20.322457 | -13.026050 | 3.077520 |
| C1 | -27.639441 | -0.215289  | 2.948323 |
| C1 | -5.589963  | -13.091242 | 3.708860 |
| C1 | -12.906948 | -0.280482  | 3.579664 |

|    |            |            |          |
|----|------------|------------|----------|
| C1 | -20.223931 | 12.530277  | 3.450468 |
| C1 | -28.453006 | -24.518547 | 2.562767 |
| C1 | -13.720514 | -24.583739 | 3.194107 |
| C1 | -21.037498 | -11.772981 | 3.064911 |
| C1 | -28.354483 | 1.037780   | 2.935714 |
| C1 | 1.011978   | -24.648932 | 3.825448 |
| C1 | -6.305005  | -11.838173 | 3.696252 |
| C1 | -13.621991 | 0.972588   | 3.567055 |
| C1 | -18.881877 | -13.032462 | 3.139253 |
| C1 | -26.198861 | -0.221703  | 3.010057 |
| C1 | -4.149383  | -13.097654 | 3.770594 |
| C1 | -11.466368 | -0.286895  | 3.641397 |
| C1 | -18.783352 | 12.523865  | 3.512201 |
| C1 | -26.287734 | -23.278570 | 2.673585 |
| C1 | -11.555242 | -23.343762 | 3.304925 |
| C1 | -18.872227 | -10.533003 | 3.175729 |
| C1 | -26.189211 | 2.277757   | 3.046532 |
| C1 | 3.177248   | -23.408954 | 3.936266 |
| C1 | -4.139735  | -10.598196 | 3.807070 |
| C1 | -11.456720 | 2.212565   | 3.677873 |
| C1 | -21.576971 | -24.549870 | 2.857417 |
| C1 | -6.844479  | -24.615062 | 3.488758 |
| C1 | 7.888012   | -24.680255 | 4.120098 |
| C1 | -20.925952 | 16.242855  | 3.473903 |
| C1 | -21.549528 | 17.328966  | 3.462810 |
| C1 | -22.217588 | 18.495176  | 3.450965 |
| C1 | -22.840828 | 19.591662  | 3.440037 |
| C1 | -28.261444 | 24.118891  | 3.272715 |
| C1 | -28.891778 | 23.037319  | 3.230058 |
| C1 | -29.568492 | 21.876995  | 3.184274 |
| C1 | -14.835999 | 21.811803  | 3.815615 |
| C1 | -30.201187 | 20.786489  | 3.141387 |
| C1 | -15.468696 | 20.721297  | 3.772728 |
| C1 | -27.548524 | 13.805143  | 3.154508 |
| C1 | -12.816033 | 13.739950  | 3.785848 |
| C1 | -25.415347 | 24.106399  | 3.394682 |
| C1 | -24.791750 | 23.020147  | 3.405773 |
| C1 | -24.125161 | 21.852857  | 3.417540 |
| C1 | -23.500776 | 20.756610  | 3.428521 |
| C1 | -18.078980 | 16.229963  | 3.595901 |
| C1 | -17.447691 | 17.311096  | 3.638593 |
| C1 | -16.772034 | 18.472651  | 3.684349 |
| C1 | -30.871923 | 19.628695  | 3.095897 |
| C1 | -16.139432 | 19.563503  | 3.727237 |
| C1 | -22.356667 | 13.782716  | 3.377006 |
| C1 | -23.608144 | 13.789506  | 3.323393 |
| C1 | -24.950558 | 13.795715  | 3.265870 |
| C1 | -10.218068 | 13.730523  | 3.897211 |
| C1 | -26.211729 | 13.800644  | 3.211815 |
| C1 | -11.479239 | 13.735452  | 3.843155 |
| C1 | -20.227780 | 15.022178  | 3.486255 |
| C1 | -27.554370 | 25.333477  | 3.320585 |
| C1 | -20.952429 | 13.775787  | 3.437172 |
| C1 | -26.113790 | 25.327065  | 3.382318 |
| C1 | -18.787159 | 15.015765  | 3.547990 |
| C1 | -28.808885 | 13.809657  | 3.100482 |
| C1 | -14.076395 | 13.744465  | 3.731822 |
| C1 | -24.156062 | -24.531665 | 2.746992 |
| C1 | -9.423571  | -24.596857 | 3.378332 |
| C1 | 5.308922   | -24.662050 | 4.009673 |
| C1 | -22.905115 | -24.537583 | 2.800594 |
| C1 | -8.172622  | -24.602775 | 3.431934 |
| C1 | 6.559868   | -24.667967 | 4.063275 |
| C1 | -25.559589 | -24.524929 | 2.686853 |
| C1 | -10.827097 | -24.590122 | 3.318194 |

|    |           |            |          |
|----|-----------|------------|----------|
| C1 | 3.905395  | -24.655314 | 3.949534 |
| C1 | 15.793554 | -22.247156 | 4.494488 |
| C1 | 8.476569  | -9.436395  | 4.365291 |
| C1 | 1.159586  | 3.374363   | 4.236095 |
| C1 | 23.209062 | -9.501588  | 4.996632 |
| C1 | 15.892078 | 3.309171   | 4.867436 |
| C1 | 15.169978 | -21.161046 | 4.483396 |
| C1 | 7.852994  | -8.350286  | 4.354199 |
| C1 | 0.536010  | 4.460473   | 4.225003 |
| C1 | 22.585486 | -8.415478  | 4.985540 |
| C1 | 15.268503 | 4.395280   | 4.856343 |
| C1 | 14.501917 | -19.994835 | 4.471550 |
| C1 | 7.184933  | -7.184074  | 4.342353 |
| C1 | -0.132052 | 5.626685   | 4.213157 |
| C1 | 21.917424 | -7.249267  | 4.973694 |
| C1 | 14.600440 | 5.561493   | 4.844498 |
| C1 | 13.878677 | -18.898349 | 4.460622 |
| C1 | 6.561693  | -6.087590  | 4.331425 |
| C1 | -0.755291 | 6.723170   | 4.202229 |
| C1 | 21.294184 | -6.152783  | 4.962766 |
| C1 | 13.977200 | 6.657978   | 4.833569 |
| C1 | 8.458061  | -14.371121 | 4.293300 |
| C1 | 1.141077  | -1.560361  | 4.164104 |
| C1 | -6.175908 | 11.250398  | 4.034907 |
| C1 | 23.190554 | -14.436313 | 4.924641 |
| C1 | 15.873569 | -1.625553  | 4.795444 |
| C1 | 8.556585  | 11.185205  | 4.666248 |
| C1 | 23.289077 | 11.120013  | 5.297588 |
| C1 | 7.827728  | -15.452692 | 4.250643 |
| C1 | 0.510743  | -2.641932  | 4.121447 |
| C1 | -6.806240 | 10.168827  | 3.992250 |
| C1 | 22.560219 | -15.517885 | 4.881984 |
| C1 | 15.243235 | -2.707124  | 4.752787 |
| C1 | 7.926250  | 10.103635  | 4.623591 |
| C1 | 22.658743 | 10.038442  | 5.254932 |
| C1 | 21.883505 | -16.678208 | 4.836200 |
| C1 | 14.566522 | -3.867450  | 4.707004 |
| C1 | 7.249536  | 8.943312   | 4.577807 |
| C1 | 21.982028 | 8.878120   | 5.209148 |
| C1 | 21.250810 | -17.768715 | 4.793313 |
| C1 | 13.933826 | -4.957954  | 4.664117 |
| C1 | 6.616842  | 7.852804   | 4.534920 |
| C1 | 21.349334 | 7.787612   | 5.166261 |
| C1 | -1.900383 | 13.698140  | 4.253717 |
| C1 | 12.733585 | -11.923380 | 4.512110 |
| C1 | 5.416600  | 0.887381   | 4.382914 |
| C1 | 12.832107 | 13.632948  | 4.885058 |
| C1 | 27.466076 | -11.988572 | 5.143451 |
| C1 | 20.149091 | 0.822188   | 5.014254 |
| C1 | 27.564601 | 13.567756  | 5.516398 |
| C1 | -0.649436 | 13.692223  | 4.307319 |
| C1 | 13.984532 | -11.929294 | 4.565712 |
| C1 | 6.667549  | 0.881462   | 4.436516 |
| C1 | 14.083056 | 13.627031  | 4.938660 |
| C1 | 21.400041 | 0.816270   | 5.067856 |
| C1 | 15.326128 | -11.934788 | 4.623211 |
| C1 | 8.009143  | 0.875972   | 4.494014 |
| C1 | 22.741635 | 0.810780   | 5.125355 |
| C1 | 23.903472 | -24.750061 | 4.806434 |
| C1 | 16.586488 | -11.939300 | 4.677237 |
| C1 | 9.269505  | 0.871456   | 4.548041 |
| C1 | 24.001998 | 0.806264   | 5.179381 |
| C1 | 11.304157 | -14.383613 | 4.415267 |
| C1 | 3.987174  | -1.572854  | 4.286071 |
| C1 | -3.329810 | 11.237906  | 4.156874 |

|    |           |            |          |
|----|-----------|------------|----------|
| C1 | 26.036650 | -14.448805 | 5.046608 |
| C1 | 18.719666 | -1.638046  | 4.917411 |
| C1 | 11.402681 | 11.172714  | 4.788215 |
| C1 | 26.135173 | 11.107522  | 5.419555 |
| C1 | 11.927754 | -15.469864 | 4.426358 |
| C1 | 4.610770  | -2.659104  | 4.297162 |
| C1 | -2.706214 | 10.151655  | 4.167965 |
| C1 | 26.660247 | -15.535057 | 5.057699 |
| C1 | 19.343262 | -2.724296  | 4.928502 |
| C1 | 12.026278 | 10.086463  | 4.799306 |
| C1 | 26.758770 | 10.021270  | 5.430647 |
| C1 | 12.594346 | -16.637154 | 4.438125 |
| C1 | 5.277361  | -3.826395  | 4.308929 |
| C1 | -2.039622 | 8.984364   | 4.179732 |
| C1 | 27.326836 | -16.702347 | 5.069466 |
| C1 | 20.009853 | -3.891587  | 4.940270 |
| C1 | 12.692869 | 8.919172   | 4.811073 |
| C1 | 27.425361 | 8.853979   | 5.442414 |
| C1 | 13.218729 | -17.733401 | 4.449106 |
| C1 | 5.901744  | -4.922643  | 4.319910 |
| C1 | -1.415239 | 7.888116   | 4.190713 |
| C1 | 20.634236 | -4.987835  | 4.951250 |
| C1 | 13.317252 | 7.822924   | 4.822054 |
| C1 | 18.640526 | -22.260048 | 4.616487 |
| C1 | 11.323541 | -9.449288  | 4.487290 |
| C1 | 4.006557  | 3.361472   | 4.358094 |
| C1 | 26.056035 | -9.514481  | 5.118631 |
| C1 | 18.739049 | 3.296280   | 4.989434 |
| C1 | 19.271815 | -21.178916 | 4.659178 |
| C1 | 11.954830 | -8.368156  | 4.529982 |
| C1 | 4.637847  | 4.442604   | 4.400785 |
| C1 | 26.687324 | -8.433348  | 5.161322 |
| C1 | 19.370339 | 4.377411   | 5.032126 |
| C1 | 19.947473 | -20.017360 | 4.704934 |
| C1 | 12.630489 | -7.206601  | 4.575738 |
| C1 | 5.313504  | 5.604160   | 4.446541 |
| C1 | 27.362980 | -7.271793  | 5.207078 |
| C1 | 20.045996 | 5.538968   | 5.077882 |
| C1 | 20.580074 | -18.926508 | 4.747822 |
| C1 | 13.263089 | -6.115749  | 4.618626 |
| C1 | 5.946106  | 6.695010   | 4.489430 |
| C1 | 20.678598 | 6.629818   | 5.120770 |
| C1 | 14.362838 | -24.707295 | 4.397591 |
| C1 | 7.046008  | -11.896804 | 4.268397 |
| C1 | -0.270977 | 0.913956   | 4.139201 |
| C1 | 21.778499 | -11.961996 | 4.899738 |
| C1 | 14.461515 | 0.848764   | 4.770541 |
| C1 | 13.111362 | -24.700505 | 4.343979 |
| C1 | 5.794378  | -11.889745 | 4.214782 |
| C1 | -1.522606 | 0.921015   | 4.085586 |
| C1 | 20.526870 | -11.954937 | 4.846123 |
| C1 | 13.209885 | 0.855823   | 4.716926 |
| C1 | 26.501438 | -24.759488 | 4.917796 |
| C1 | 19.184454 | -11.948729 | 4.788599 |
| C1 | 11.867471 | 0.862030   | 4.659403 |
| C1 | 26.599963 | 0.796838   | 5.290744 |
| C1 | 25.240268 | -24.754560 | 4.863741 |
| C1 | 17.923283 | -11.943800 | 4.734544 |
| C1 | 10.606299 | 0.866960   | 4.605348 |
| C1 | 25.338791 | 0.801767   | 5.236688 |
| C1 | -3.303911 | 13.704876  | 4.193579 |
| C1 | 11.330058 | -11.916643 | 4.451972 |
| C1 | 4.013074  | 0.894117   | 4.322775 |
| C1 | 11.428582 | 13.639684  | 4.824919 |
| C1 | 26.062550 | -11.981836 | 5.083312 |

|    |            |            |          |
|----|------------|------------|----------|
| C1 | 18.745565  | 0.828925   | 4.954116 |
| C1 | 26.161073  | 13.574491  | 5.456260 |
| C1 | 16.491724  | -23.467834 | 4.506840 |
| C1 | 9.174741   | -10.657074 | 4.377644 |
| C1 | 1.857756   | 2.153686   | 4.248447 |
| C1 | 23.907232  | -10.722266 | 5.008984 |
| C1 | 16.590248  | 2.088493   | 4.879788 |
| C1 | 9.165134   | -13.156534 | 4.341170 |
| C1 | 1.848150   | -0.345774  | 4.211973 |
| C1 | -5.468833  | 12.464985  | 4.082777 |
| C1 | 23.897626  | -13.221727 | 4.972510 |
| C1 | 16.580641  | -0.410966  | 4.843314 |
| C1 | 9.263658   | 12.399793  | 4.714117 |
| C1 | 23.996151  | 12.334600  | 5.345458 |
| C1 | 15.767077  | -24.714224 | 4.457757 |
| C1 | 8.450093   | -11.903465 | 4.328561 |
| C1 | 1.133109   | 0.907295   | 4.199364 |
| C1 | 23.182585  | -11.968658 | 4.959902 |
| C1 | 15.865599  | 0.842103   | 4.830705 |
| C1 | 10.605714  | -13.162946 | 4.402903 |
| C1 | 3.288731   | -0.352187  | 4.273707 |
| C1 | -4.028255  | 12.458573  | 4.144510 |
| C1 | 25.338206  | -13.228138 | 5.034244 |
| C1 | 18.021221  | -0.417380  | 4.905047 |
| C1 | 10.704237  | 12.393381  | 4.775851 |
| C1 | 25.436730  | 12.328189  | 5.407191 |
| C1 | 17.932349  | -23.474246 | 4.568575 |
| C1 | 10.615364  | -10.663488 | 4.439379 |
| C1 | 3.298380   | 2.147273   | 4.310182 |
| C1 | 25.347856  | -10.728680 | 5.070719 |
| C1 | 18.030871  | 2.082081   | 4.941523 |
| C1 | 22.643111  | -24.745547 | 4.752407 |
| C1 | -6.170853  | 16.177563  | 4.106212 |
| C1 | 8.561639   | 16.112371  | 4.737553 |
| C1 | 23.294131  | 16.047179  | 5.368893 |
| C1 | -6.794429  | 17.263674  | 4.095120 |
| C1 | 7.938064   | 17.198481  | 4.726460 |
| C1 | 22.670554  | 17.133289  | 5.357801 |
| C1 | -7.462490  | 18.429884  | 4.083274 |
| C1 | 7.270002   | 18.364692  | 4.714615 |
| C1 | 22.002494  | 18.299500  | 5.345955 |
| C1 | -8.085730  | 19.526370  | 4.072346 |
| C1 | 6.646762   | 19.461178  | 4.703686 |
| C1 | 21.379254  | 19.395986  | 5.335027 |
| C1 | -13.506346 | 24.053599  | 3.905024 |
| C1 | 1.226147   | 23.988406  | 4.536365 |
| C1 | 15.958638  | 23.923214  | 5.167705 |
| C1 | -14.136679 | 22.972027  | 3.862367 |
| C1 | 0.595812   | 22.906835  | 4.493708 |
| C1 | 15.328305  | 22.841642  | 5.125049 |
| C1 | -0.080901  | 21.746511  | 4.447924 |
| C1 | 14.651590  | 21.681319  | 5.079265 |
| C1 | -0.713597  | 20.656004  | 4.405037 |
| C1 | 14.018896  | 20.590812  | 5.036378 |
| C1 | 1.939066   | 13.674658  | 4.418158 |
| C1 | 16.671558  | 13.609466  | 5.049498 |
| C1 | -10.660249 | 24.041106  | 4.026991 |
| C1 | 4.072243   | 23.975914  | 4.658332 |
| C1 | 18.804736  | 23.910722  | 5.289673 |
| C1 | -10.036653 | 22.954855  | 4.038082 |
| C1 | 4.695840   | 22.889663  | 4.669423 |
| C1 | 19.428332  | 22.824470  | 5.300764 |
| C1 | -9.370061  | 21.787565  | 4.049849 |
| C1 | 5.362429   | 21.722373  | 4.681190 |
| C1 | 20.094922  | 21.657180  | 5.312531 |

|    |            |            |          |
|----|------------|------------|----------|
| C1 | -8.745678  | 20.691318  | 4.060830 |
| C1 | 5.986813   | 20.626126  | 4.692171 |
| C1 | 20.719307  | 20.560933  | 5.323511 |
| C1 | -3.323881  | 16.164671  | 4.228211 |
| C1 | 11.408611  | 16.099479  | 4.859551 |
| C1 | 26.141103  | 16.034287  | 5.490892 |
| C1 | -2.692592  | 17.245804  | 4.270902 |
| C1 | 12.039900  | 17.180611  | 4.902243 |
| C1 | 26.772392  | 17.115419  | 5.533583 |
| C1 | -2.016934  | 18.407359  | 4.316658 |
| C1 | 12.715558  | 18.342167  | 4.947999 |
| C1 | 27.448048  | 18.276975  | 5.579340 |
| C1 | -1.384333  | 19.498211  | 4.359547 |
| C1 | 13.348159  | 19.433019  | 4.990887 |
| C1 | -7.601569  | 13.717424  | 4.009315 |
| C1 | 7.130923   | 13.652232  | 4.640656 |
| C1 | 21.863415  | 13.587039  | 5.271996 |
| C1 | -8.853045  | 13.724214  | 3.955703 |
| C1 | 5.879446   | 13.659021  | 4.587043 |
| C1 | 20.611939  | 13.593829  | 5.218384 |
| C1 | 4.537032   | 13.665231  | 4.529520 |
| C1 | 19.269524  | 13.600038  | 5.160861 |
| C1 | 3.275861   | 13.670160  | 4.475465 |
| C1 | 18.008353  | 13.604967  | 5.106805 |
| C1 | -5.472683  | 14.956886  | 4.118564 |
| C1 | 9.259810   | 14.891693  | 4.749905 |
| C1 | 23.992302  | 14.826501  | 5.381245 |
| C1 | -12.799272 | 25.268185  | 3.952894 |
| C1 | 1.933219   | 25.202993  | 4.584234 |
| C1 | 16.665713  | 25.137800  | 5.215575 |
| C1 | -6.197330  | 13.710495  | 4.069481 |
| C1 | 8.535161   | 13.645303  | 4.700822 |
| C1 | 23.267654  | 13.580111  | 5.332163 |
| C1 | -11.358693 | 25.261773  | 4.014627 |
| C1 | 3.373799   | 25.196581  | 4.645968 |
| C1 | 18.106292  | 25.131389  | 5.277309 |
| C1 | -4.032058  | 14.950473  | 4.180299 |
| C1 | 10.700433  | 14.885280  | 4.811640 |
| C1 | 25.432924  | 14.820088  | 5.442981 |
| C1 | 0.678705   | 13.679172  | 4.364131 |
| C1 | 15.411197  | 13.613980  | 4.995472 |
| C1 | 20.064021  | -24.727342 | 4.641982 |
| C1 | 21.314968  | -24.733259 | 4.695584 |
| C1 | 18.660493  | -24.720606 | 4.581843 |

### S.3. Cartesian coordinates of the final configuration obtained for the CO<sub>2</sub>/N<sub>2</sub> mixture with bilayer membrane

|   |            |            |           |
|---|------------|------------|-----------|
| C | -15.376417 | -22.092007 | -0.020034 |
| C | -22.692342 | -9.280108  | 0.034523  |
| C | -0.630416  | -22.156988 | -0.036981 |
| C | -7.946341  | -9.345089  | 0.017576  |
| C | -15.262268 | 3.466809   | 0.072133  |
| C | -16.000438 | -21.006052 | -0.015405 |
| C | -23.316364 | -8.194153  | 0.039152  |
| C | -1.254436  | -21.071033 | -0.032352 |
| C | -8.570363  | -8.259134  | 0.022205  |
| C | -15.886290 | 4.552765   | 0.076762  |
| C | 12.824204  | -19.968924 | -0.044328 |
| C | 5.508278   | -7.157025  | 0.010229  |
| C | -1.807648  | 5.654873   | 0.064786  |

|   |            |            |           |
|---|------------|------------|-----------|
| C | -16.667803 | -19.838962 | -0.010434 |
| C | -23.983729 | -7.027063  | 0.044123  |
| C | -1.921802  | -19.903943 | -0.027381 |
| C | -9.237728  | -7.092044  | 0.027176  |
| C | -16.553654 | 5.719854   | 0.081733  |
| C | 12.199240  | -18.872971 | -0.039662 |
| C | 4.883313   | -6.061073  | 0.014895  |
| C | -2.432614  | 6.750827   | 0.069452  |
| C | -17.292767 | -18.743009 | -0.005768 |
| C | -24.608694 | -5.931111  | 0.048789  |
| C | -2.546767  | -18.807990 | -0.022715 |
| C | -9.862693  | -5.996092  | 0.031842  |
| C | -17.178620 | 6.815808   | 0.086399  |
| C | -22.714038 | -14.214788 | 0.016728  |
| C | -7.968033  | -14.279769 | -0.000219 |
| C | -15.283959 | -1.467871  | 0.054338  |
| C | -22.599887 | 11.344029  | 0.108895  |
| C | 6.777971   | -14.344750 | -0.017166 |
| C | -0.537955  | -1.532852  | 0.037391  |
| C | -7.853883  | 11.279048  | 0.091948  |
| C | -23.347419 | -15.295520 | 0.013543  |
| C | -8.601415  | -15.360501 | -0.003404 |
| C | -15.917341 | -2.548603  | 0.051153  |
| C | -23.233267 | 10.263298  | 0.105710  |
| C | 6.144589   | -15.425483 | -0.020351 |
| C | -1.171337  | -2.613584  | 0.034206  |
| C | -8.487264  | 10.198317  | 0.088763  |
| C | -24.025228 | -16.456710 | 0.010118  |
| C | -9.279223  | -16.521691 | -0.006829 |
| C | -16.595149 | -3.709793  | 0.047728  |
| C | -23.911075 | 9.102108   | 0.102285  |
| C | 5.466781   | -16.586672 | -0.023776 |
| C | -1.849145  | -3.774774  | 0.030781  |
| C | -9.165072  | 9.037127   | 0.085338  |
| C | -24.659817 | -17.547226 | 0.006899  |
| C | -9.913811  | -17.612207 | -0.010048 |
| C | -17.229738 | -4.800307  | 0.044510  |
| C | -24.545664 | 8.011591   | 0.099067  |
| C | 4.832192   | -17.677188 | -0.026994 |
| C | -2.483734  | -4.865288  | 0.027563  |
| C | -9.799660  | 7.946610   | 0.082120  |
| C | -25.861393 | -24.513044 | -0.016893 |
| C | -11.115389 | -24.578025 | -0.033840 |
| C | -18.431141 | -11.766431 | 0.020715  |
| C | -25.747065 | 1.045465   | 0.075272  |
| C | 3.630618   | -24.643006 | -0.050787 |
| C | -3.685134  | -11.831413 | 0.003768  |
| C | -11.001059 | 0.980483   | 0.058326  |
| C | -17.178376 | -11.773140 | 0.019271  |
| C | -24.494300 | 1.038756   | 0.073828  |
| C | -2.432372  | -11.838121 | 0.002324  |
| C | -9.748296  | 0.973775   | 0.056881  |
| C | -15.834714 | -11.779125 | 0.017727  |
| C | -23.150639 | 1.032771   | 0.072284  |
| C | -15.720562 | 13.779690  | 0.109894  |
| C | -1.088710  | -11.844106 | 0.000780  |
| C | -8.404635  | 0.967790   | 0.055337  |
| C | -14.572340 | -11.783961 | 0.016279  |
| C | -21.888264 | 1.027934   | 0.070836  |
| C | -14.458187 | 13.774854  | 0.108446  |
| C | 0.173664   | -11.848942 | -0.000668 |
| C | -7.142260  | 0.962953   | 0.053889  |
| C | -19.864639 | -14.227600 | 0.013452  |
| C | -27.180566 | -1.415702  | 0.068010  |
| C | -5.118636  | -14.292581 | -0.003494 |

|   |            |            |           |
|---|------------|------------|-----------|
| C | -12.434562 | -1.480683  | 0.051063  |
| C | -19.750489 | 11.331217  | 0.105620  |
| C | -19.242600 | -15.314593 | 0.008822  |
| C | -26.558527 | -2.502693  | 0.063379  |
| C | -4.496596  | -15.379574 | -0.008125 |
| C | -11.812524 | -2.567674  | 0.046432  |
| C | -19.128449 | 10.244224  | 0.100989  |
| C | -18.575831 | -16.481388 | 0.003853  |
| C | -25.891757 | -3.669488  | 0.058410  |
| C | -3.829826  | -16.546369 | -0.013094 |
| C | -11.145753 | -3.734469  | 0.041463  |
| C | -18.461680 | 9.077429   | 0.096020  |
| C | -17.952861 | -17.578201 | -0.000814 |
| C | -25.268787 | -4.766301  | 0.053743  |
| C | -3.206856  | -17.643182 | -0.017761 |
| C | -10.522783 | -4.831282  | 0.036796  |
| C | -17.838709 | 7.980616   | 0.091353  |
| C | -27.273861 | -22.038862 | -0.006358 |
| C | -12.527856 | -22.103843 | -0.023305 |
| C | -19.843783 | -9.291945  | 0.031252  |
| C | -27.159709 | 3.519956   | 0.085809  |
| C | 2.218149   | -22.168825 | -0.040252 |
| C | -5.097778  | -9.356927  | 0.014305  |
| C | -12.413704 | 3.454974   | 0.068862  |
| C | -26.643269 | -20.956572 | -0.003164 |
| C | -11.897264 | -21.021553 | -0.020111 |
| C | -19.213190 | -8.209654  | 0.034446  |
| C | -26.529116 | 4.602244   | 0.089003  |
| C | 2.848741   | -21.086534 | -0.037058 |
| C | -4.467185  | -8.274635  | 0.017499  |
| C | -11.783111 | 4.537263   | 0.072056  |
| C | -25.965955 | -19.795598 | 0.000261  |
| C | -11.219950 | -19.860579 | -0.016686 |
| C | -18.535875 | -7.048681  | 0.037871  |
| C | -25.851802 | 5.763219   | 0.092428  |
| C | 3.526054   | -19.925560 | -0.033633 |
| C | -3.789872  | -7.113662  | 0.020924  |
| C | -11.105799 | 5.698238   | 0.075481  |
| C | -25.332249 | -18.704950 | 0.003481  |
| C | -10.586245 | -18.769931 | -0.013466 |
| C | -17.902172 | -5.958032  | 0.041091  |
| C | -25.218099 | 6.853867   | 0.095648  |
| C | 4.159760   | -18.834912 | -0.030413 |
| C | -3.156167  | -6.023013  | 0.024144  |
| C | -10.472094 | 6.788886   | 0.078701  |
| C | -16.807862 | -24.552940 | -0.027298 |
| C | -24.123971 | -11.740721 | 0.027260  |
| C | -2.061858  | -24.617921 | -0.044245 |
| C | -9.377968  | -11.805702 | 0.010313  |
| C | -16.693893 | 1.006196   | 0.064870  |
| C | 12.684148  | -24.682902 | -0.061192 |
| C | 5.368038   | -11.870683 | -0.006634 |
| C | -1.947887  | 0.941215   | 0.047923  |
| C | -18.060139 | -24.546207 | -0.025855 |
| C | -25.376065 | -11.734308 | 0.028702  |
| C | -3.314135  | -24.611188 | -0.042802 |
| C | -10.630062 | -11.799289 | 0.011755  |
| C | -17.945988 | 1.012610   | 0.066313  |
| C | 11.431871  | -24.676170 | -0.059749 |
| C | 4.115944   | -11.864271 | -0.005191 |
| C | -3.199982  | 0.947629   | 0.049366  |
| C | -19.402902 | -24.540328 | -0.024312 |
| C | -26.718829 | -11.728429 | 0.030246  |
| C | -4.656899  | -24.605309 | -0.041258 |
| C | -11.972826 | -11.793410 | 0.013299  |

|   |            |            |           |
|---|------------|------------|-----------|
| C | -19.288752 | 1.018488   | 0.067856  |
| C | 10.089107  | -24.670290 | -0.058205 |
| C | 2.773180   | -11.858391 | -0.003648 |
| C | -4.542746  | 0.953507   | 0.050909  |
| C | -20.664404 | -24.535472 | -0.022864 |
| C | -5.918399  | -24.600453 | -0.039811 |
| C | -13.234326 | -11.788554 | 0.014746  |
| C | -20.550253 | 1.023346   | 0.069303  |
| C | 8.827605   | -24.665434 | -0.056758 |
| C | 1.511678   | -11.853535 | -0.002201 |
| C | -5.804249  | 0.958365   | 0.052356  |
| C | -27.266628 | -24.506851 | -0.015278 |
| C | -12.520623 | -24.571832 | -0.032225 |
| C | -19.836490 | -11.760037 | 0.022331  |
| C | -27.152418 | 1.051864   | 0.076888  |
| C | 2.225382   | -24.636813 | -0.049172 |
| C | -5.090485  | -11.825019 | 0.005384  |
| C | -12.406413 | 0.986882   | 0.059941  |
| C | -14.677736 | -23.312706 | -0.025234 |
| C | -21.993662 | -10.500806 | 0.029323  |
| C | 0.068268   | -23.377687 | -0.042181 |
| C | -7.247657  | -10.565788 | 0.012376  |
| C | -14.563584 | 2.246110   | 0.066933  |
| C | -22.004450 | -13.000500 | 0.020309  |
| C | -7.258446  | -13.065481 | 0.003362  |
| C | -14.574372 | -0.253581  | 0.057919  |
| C | -21.890298 | 12.558317  | 0.112476  |
| C | 7.487558   | -13.130462 | -0.013585 |
| C | 0.171631   | -0.318562  | 0.040972  |
| C | -7.144294  | 12.493336  | 0.095529  |
| C | -15.403394 | -24.559129 | -0.028912 |
| C | -22.719255 | -11.747343 | 0.025644  |
| C | -0.657390  | -24.624110 | -0.045859 |
| C | -7.973252  | -11.812324 | 0.008697  |
| C | -15.289177 | 0.999572   | 0.063254  |
| C | 14.088616  | -24.689091 | -0.062806 |
| C | 6.772754   | -11.877305 | -0.008250 |
| C | -0.543171  | 0.934591   | 0.046307  |
| C | -20.562459 | -13.006662 | 0.018652  |
| C | -5.816455  | -13.071643 | 0.001705  |
| C | -13.132382 | -0.259743  | 0.056262  |
| C | -20.448307 | 12.552155  | 0.110819  |
| C | -13.235819 | -23.318869 | -0.026890 |
| C | -20.551745 | -10.506969 | 0.027667  |
| C | 1.510186   | -23.383850 | -0.043837 |
| C | -5.805740  | -10.571950 | 0.010720  |
| C | -13.121667 | 2.239948   | 0.065277  |
| C | -24.608454 | -24.520060 | -0.018339 |
| C | -9.862449  | -24.585041 | -0.035286 |
| C | 4.883556   | -24.650022 | -0.052233 |
| C | -22.591666 | 16.271149  | 0.126678  |
| C | -23.215687 | 17.357103  | 0.131307  |
| C | -9.137046  | 18.459212  | 0.119331  |
| C | -23.883052 | 18.524194  | 0.136278  |
| C | -9.762011  | 19.555165  | 0.123997  |
| C | -24.508018 | 19.620146  | 0.140944  |
| C | -15.183280 | 24.083386  | 0.146493  |
| C | -15.816661 | 23.002654  | 0.143308  |
| C | -16.494469 | 21.841464  | 0.139883  |
| C | -17.129058 | 20.750948  | 0.136665  |
| C | -18.330633 | 13.785131  | 0.112872  |
| C | -27.079887 | 24.135555  | 0.160165  |
| C | -26.457846 | 23.048562  | 0.155534  |
| C | -25.791077 | 21.881767  | 0.150565  |
| C | -25.168106 | 20.784955  | 0.145898  |

|   |            |            |           |
|---|------------|------------|-----------|
| C | -19.743102 | 16.259312  | 0.123407  |
| C | -19.112509 | 17.341603  | 0.126601  |
| C | -18.435196 | 18.502577  | 0.130026  |
| C | -17.801491 | 19.593224  | 0.133246  |
| C | -24.023109 | 13.810216  | 0.119414  |
| C | -9.277103  | 13.745234  | 0.102467  |
| C | -25.275385 | 13.816948  | 0.120858  |
| C | -10.529379 | 13.751967  | 0.103911  |
| C | -26.618150 | 13.822827  | 0.122401  |
| C | -11.872144 | 13.757846  | 0.105454  |
| C | -13.133646 | 13.762702  | 0.106901  |
| C | -19.735868 | 13.791323  | 0.114487  |
| C | -21.892982 | 15.050450  | 0.121478  |
| C | -14.473692 | 25.297674  | 0.150074  |
| C | -22.618640 | 13.804027  | 0.117800  |
| C | -7.872634  | 13.739045  | 0.100853  |
| C | -20.451064 | 15.044287  | 0.119822  |
| C | -17.077694 | 13.778114  | 0.111426  |
| C | -23.251323 | -24.519247 | -0.019874 |
| C | -8.505318  | -24.584228 | -0.036821 |
| C | 6.240685   | -24.649210 | -0.053768 |
| C | -21.988950 | -24.524083 | -0.021322 |
| C | -7.242945  | -24.589064 | -0.038269 |
| C | 7.503060   | -24.654045 | -0.055216 |
| C | 14.138218  | -22.222069 | -0.053954 |
| C | 6.822292   | -9.410170  | 0.000603  |
| C | -0.493634  | 3.401728   | 0.055160  |
| C | 28.884224  | -22.287050 | -0.070901 |
| C | 21.568299  | -9.475151  | -0.016344 |
| C | 14.252373  | 3.336747   | 0.038213  |
| C | 28.998373  | 3.271766   | 0.021266  |
| C | 28.260203  | -21.201095 | -0.066272 |
| C | 20.944277  | -8.389196  | -0.011715 |
| C | 13.628350  | 4.422703   | 0.042842  |
| C | 28.374351  | 4.357721   | 0.025895  |
| C | 27.592838  | -20.034005 | -0.061301 |
| C | 20.276912  | -7.222106  | -0.006744 |
| C | 12.960986  | 5.589792   | 0.047813  |
| C | 27.706987  | 5.524811   | 0.030866  |
| C | 26.967874  | -18.938052 | -0.056635 |
| C | 19.651947  | -6.126154  | -0.002078 |
| C | 12.336020  | 6.685746   | 0.052479  |
| C | 27.082021  | 6.620765   | 0.035532  |
| C | 21.546603  | -14.409831 | -0.034139 |
| C | 14.230677  | -1.597933  | 0.020418  |
| C | 6.914750   | 11.213967  | 0.074975  |
| C | 28.976682  | -1.662914  | 0.003471  |
| C | 21.660754  | 11.148986  | 0.058028  |
| C | 20.913222  | -15.490563 | -0.037324 |
| C | 13.597296  | -2.678665  | 0.017233  |
| C | 6.281369   | 10.133236  | 0.071790  |
| C | 28.343300  | -2.743646  | 0.000286  |
| C | 21.027374  | 10.068255  | 0.054843  |
| C | 20.235413  | -16.651753 | -0.040749 |
| C | 12.919487  | -3.839855  | 0.013808  |
| C | 5.603560   | 8.972046   | 0.068365  |
| C | 27.665492  | -3.904836  | -0.003139 |
| C | 20.349566  | 8.907065   | 0.051418  |
| C | 19.600824  | -17.742269 | -0.043967 |
| C | 12.284897  | -4.930369  | 0.010590  |
| C | 4.968972   | 7.881529   | 0.065147  |
| C | 27.030903  | -4.995350  | -0.006357 |
| C | 19.714977  | 7.816548   | 0.048200  |
| C | 18.399248  | -24.708087 | -0.067760 |
| C | 11.083496  | -11.896493 | -0.013204 |

|   |            |            |           |
|---|------------|------------|-----------|
| C | 3.767572   | 0.915403   | 0.041353  |
| C | 25.829501  | -11.961475 | -0.030151 |
| C | 18.513576  | 0.850422   | 0.024406  |
| C | 12.336260  | -11.903202 | -0.014649 |
| C | 5.020336   | 0.908694   | 0.039908  |
| C | 27.082265  | -11.968183 | -0.031595 |
| C | 19.766341  | 0.843713   | 0.022962  |
| C | -0.951929  | 13.714609  | 0.092921  |
| C | 13.679923  | -11.909187 | -0.016193 |
| C | 6.363998   | 0.902709   | 0.038364  |
| C | 13.794076  | 13.649628  | 0.075974  |
| C | 28.425927  | -11.974168 | -0.033140 |
| C | 21.110002  | 0.837728   | 0.021417  |
| C | 28.540079  | 13.584647  | 0.059027  |
| C | 0.310444   | 13.709773  | 0.091473  |
| C | 14.942296  | -11.914023 | -0.017641 |
| C | 7.626371   | 0.897872   | 0.036916  |
| C | 15.056449  | 13.644792  | 0.074526  |
| C | -29.326499 | -11.979004 | -0.034588 |
| C | 22.372377  | 0.832891   | 0.019969  |
| C | -29.212346 | 13.579811  | 0.057579  |
| C | 9.649997   | -14.357662 | -0.020467 |
| C | 2.334071   | -1.545764  | 0.034090  |
| C | -4.981857  | 11.266136  | 0.088647  |
| C | 24.396002  | -14.422643 | -0.037414 |
| C | 17.080075  | -1.610745  | 0.017143  |
| C | 9.764149   | 11.201155  | 0.071700  |
| C | 24.510152  | 11.136174  | 0.054753  |
| C | 10.272037  | -15.444655 | -0.025098 |
| C | 2.956109   | -2.632755  | 0.029459  |
| C | -4.359816  | 10.179143  | 0.084016  |
| C | 25.018041  | -15.509636 | -0.042045 |
| C | 17.702114  | -2.697736  | 0.012512  |
| C | 10.386189  | 10.114162  | 0.067069  |
| C | 25.132192  | 10.049181  | 0.050122  |
| C | 10.938806  | -16.611450 | -0.030067 |
| C | 3.622880   | -3.799550  | 0.024490  |
| C | -3.693046  | 9.012348   | 0.079047  |
| C | 25.684810  | -16.676431 | -0.047014 |
| C | 18.368884  | -3.864531  | 0.007543  |
| C | 11.052958  | 8.947367   | 0.062100  |
| C | 25.798961  | 8.882386   | 0.045153  |
| C | 11.561348  | -17.708261 | -0.034733 |
| C | 4.245422   | -4.896361  | 0.019824  |
| C | -3.070504  | 7.915537   | 0.074381  |
| C | 26.307780  | -17.773244 | -0.051681 |
| C | 18.991854  | -4.961344  | 0.002876  |
| C | 11.675927  | 7.850554   | 0.057433  |
| C | 26.421932  | 7.785573   | 0.040486  |
| C | 16.986780  | -22.233905 | -0.057225 |
| C | 9.670854   | -9.422007  | -0.002668 |
| C | 2.354926   | 3.389894   | 0.051889  |
| C | 24.416858  | -9.486989  | -0.019615 |
| C | 17.100932  | 3.324913   | 0.034942  |
| C | 17.617372  | -21.151615 | -0.054031 |
| C | 10.301447  | -8.339716  | 0.000526  |
| C | 2.985520   | 4.472182   | 0.055083  |
| C | 25.047451  | -8.404697  | -0.016421 |
| C | 17.731525  | 4.407201   | 0.038136  |
| C | 18.294686  | -19.990641 | -0.050606 |
| C | 10.978761  | -7.178743  | 0.003951  |
| C | 3.662834   | 5.633157   | 0.058508  |
| C | 25.724766  | -7.243724  | -0.012996 |
| C | 18.408839  | 5.568176   | 0.041561  |
| C | 18.928392  | -18.899993 | -0.047386 |

|   |            |            |           |
|---|------------|------------|-----------|
| C | 11.612465  | -6.088094  | 0.007171  |
| C | 4.296538   | 6.723805   | 0.061728  |
| C | 26.358469  | -6.153075  | -0.009776 |
| C | 19.042542  | 6.658824   | 0.044781  |
| C | 27.452779  | -24.747983 | -0.078165 |
| C | 20.136670  | -11.935764 | -0.023607 |
| C | 12.820744  | 0.876134   | 0.030950  |
| C | 27.566748  | 0.811153   | 0.014003  |
| C | 26.200502  | -24.741250 | -0.076721 |
| C | 18.884576  | -11.929351 | -0.022164 |
| C | 11.568650  | 0.882548   | 0.032393  |
| C | 26.314653  | 0.817567   | 0.015446  |
| C | 24.857739  | -24.735371 | -0.075178 |
| C | 17.541812  | -11.923472 | -0.020621 |
| C | 10.225885  | 0.888426   | 0.033936  |
| C | 24.971889  | 0.823445   | 0.016989  |
| C | 23.596237  | -24.730515 | -0.073731 |
| C | 16.280310  | -11.918616 | -0.019174 |
| C | 8.964383   | 0.893284   | 0.035383  |
| C | -27.988485 | -11.983597 | -0.036121 |
| C | 23.710388  | 0.828303   | 0.018436  |
| C | 16.994013  | -24.701894 | -0.066145 |
| C | 9.678146   | -11.890099 | -0.011589 |
| C | 2.362219   | 0.921802   | 0.042968  |
| C | 24.424151  | -11.955081 | -0.028536 |
| C | 17.108223  | 0.856820   | 0.026021  |
| C | 14.836901  | -23.442767 | -0.059154 |
| C | 7.520975   | -10.630868 | -0.004597 |
| C | 0.205049   | 2.181030   | 0.049960  |
| C | -29.431895 | -23.507749 | -0.076101 |
| C | 22.266979  | -10.695850 | -0.021544 |
| C | 14.951053  | 2.116048   | 0.033013  |
| C | -29.317743 | 2.051067   | 0.016067  |
| C | 22.256191  | -13.195543 | -0.030558 |
| C | 14.940264  | -0.383643  | 0.023999  |
| C | 7.624339   | 12.428255  | 0.078556  |
| C | -29.328531 | -0.448624  | 0.007052  |
| C | 22.370343  | 12.363274  | 0.061609  |
| C | 28.857247  | -24.754172 | -0.079779 |
| C | 21.541386  | -11.942386 | -0.025223 |
| C | 14.225461  | 0.869510   | 0.029334  |
| C | 28.971464  | 0.804529   | 0.012387  |
| C | 8.952177   | -13.136724 | -0.015268 |
| C | 1.636250   | -0.324824  | 0.039289  |
| C | -5.679676  | 12.487074  | 0.093846  |
| C | 23.698182  | -13.201705 | -0.032215 |
| C | 16.382255  | -0.389805  | 0.022342  |
| C | 9.066329   | 12.422093  | 0.076899  |
| C | -27.886541 | -0.454787  | 0.005395  |
| C | 23.812334  | 12.357112  | 0.059953  |
| C | 16.278817  | -23.448931 | -0.060810 |
| C | 8.962891   | -10.637031 | -0.006253 |
| C | 1.646965   | 2.174868   | 0.048304  |
| C | -27.989978 | -23.513912 | -0.077757 |
| C | 23.708896  | -10.702012 | -0.023200 |
| C | 16.392970  | 2.109886   | 0.031357  |
| C | -27.875826 | 2.044905   | 0.014410  |
| C | 13.514197  | -21.136114 | -0.049325 |
| C | 6.198271   | -8.324215  | 0.005232  |
| C | -1.117656  | 4.487684   | 0.059789  |
| C | 19.652187  | -24.715103 | -0.069206 |
| C | -7.823032  | 16.206068  | 0.109705  |
| C | 6.922974   | 16.141087  | 0.092758  |
| C | 21.668975  | 16.076106  | 0.075811  |
| C | 6.298953   | 17.227041  | 0.097387  |

|   |            |           |          |
|---|------------|-----------|----------|
| C | 21.044954  | 17.162060 | 0.080440 |
| C | 5.631588   | 18.394132 | 0.102358 |
| C | 20.377589  | 18.329150 | 0.085411 |
| C | 5.006623   | 19.490084 | 0.107024 |
| C | 19.752623  | 19.425103 | 0.090077 |
| C | -0.414647  | 24.018305 | 0.129520 |
| C | 14.331357  | 23.953324 | 0.112573 |
| C | 29.077361  | 23.888343 | 0.095626 |
| C | -1.048029  | 22.937573 | 0.126335 |
| C | 13.697976  | 22.872592 | 0.109388 |
| C | 28.443980  | 22.807611 | 0.092441 |
| C | -1.725837  | 21.776383 | 0.122910 |
| C | 13.020168  | 21.711402 | 0.105963 |
| C | 27.766172  | 21.646421 | 0.089016 |
| C | -2.360426  | 20.685867 | 0.119692 |
| C | 12.385580  | 20.620886 | 0.102745 |
| C | 27.131583  | 20.555905 | 0.085798 |
| C | -3.562002  | 13.720050 | 0.095899 |
| C | 11.184002  | 13.655069 | 0.078952 |
| C | 25.930008  | 13.590088 | 0.062005 |
| C | -12.311254 | 24.070474 | 0.143192 |
| C | 2.434751   | 24.005493 | 0.126245 |
| C | 17.180754  | 23.940512 | 0.109298 |
| C | -11.689214 | 22.983482 | 0.138561 |
| C | 3.056791   | 22.918500 | 0.121614 |
| C | 17.802795  | 22.853519 | 0.104667 |
| C | -11.022444 | 21.816687 | 0.133592 |
| C | 3.723560   | 21.751705 | 0.116645 |
| C | 18.469564  | 21.686724 | 0.099698 |
| C | -10.399902 | 20.719876 | 0.128926 |
| C | 4.346530   | 20.654893 | 0.111978 |
| C | 19.092535  | 20.589912 | 0.095031 |
| C | -4.974471  | 16.194231 | 0.106434 |
| C | 9.771534   | 16.129250 | 0.089487 |
| C | 24.517540  | 16.064269 | 0.072540 |
| C | -4.343878  | 17.276522 | 0.109628 |
| C | 10.402127  | 17.211541 | 0.092681 |
| C | 25.148132  | 17.146559 | 0.075734 |
| C | -3.666564  | 18.437496 | 0.113053 |
| C | 11.079441  | 18.372515 | 0.096106 |
| C | 25.825445  | 18.307533 | 0.079159 |
| C | -3.032859  | 19.528144 | 0.116273 |
| C | 11.713145  | 19.463163 | 0.099326 |
| C | 26.459150  | 19.398181 | 0.082379 |
| C | 5.491528   | 13.680154 | 0.085494 |
| C | 20.237532  | 13.615173 | 0.068547 |
| C | 4.239251   | 13.686886 | 0.086938 |
| C | 18.985256  | 13.621905 | 0.069991 |
| C | 2.896488   | 13.692765 | 0.088481 |
| C | 17.642491  | 13.627784 | 0.071534 |
| C | 1.634986   | 13.697621 | 0.089928 |
| C | 16.380991  | 13.632640 | 0.072981 |
| C | -27.887805 | 13.567659 | 0.056034 |
| C | -4.967237  | 13.726242 | 0.097514 |
| C | 9.778768   | 13.661261 | 0.080567 |
| C | 24.524773  | 13.596280 | 0.063620 |
| C | -7.124349  | 14.985369 | 0.104505 |
| C | 7.621655   | 14.920388 | 0.087558 |
| C | 22.367659  | 14.855407 | 0.070612 |
| C | 0.294940   | 25.232593 | 0.133101 |
| C | 15.040945  | 25.167612 | 0.116154 |
| C | -29.227851 | 25.102631 | 0.099207 |
| C | 6.895997   | 13.673965 | 0.083880 |
| C | 21.642001  | 13.608983 | 0.066933 |
| C | -13.009074 | 25.291412 | 0.148391 |

|   |            |            |           |
|---|------------|------------|-----------|
| C | 1.736931   | 25.226431  | 0.131444  |
| C | 16.482935  | 25.161450  | 0.114498  |
| C | -5.682433  | 14.979206  | 0.102849  |
| C | 9.063572   | 14.914225  | 0.085902  |
| C | 23.809577  | 14.849244  | 0.068955  |
| C | -8.447053  | 17.292022  | 0.114334  |
| C | -2.309064  | 13.713033  | 0.094453  |
| C | 12.436942  | 13.648052  | 0.077507  |
| C | 27.182947  | 13.583071  | 0.060560  |
| C | 21.009318  | -24.714290 | -0.070741 |
| C | 22.271691  | -24.719126 | -0.072189 |
| C | -27.763233 | 25.096369  | 0.097525  |
| C | -28.348035 | -22.704245 | 3.622874  |
| C | -13.602113 | -22.785940 | 3.605544  |
| C | -20.903527 | -9.965714  | 3.646674  |
| C | -28.204940 | 2.854510   | 3.687804  |
| C | 1.143807   | -22.867636 | 3.588214  |
| C | -6.157606  | -10.047409 | 3.629344  |
| C | -13.459020 | 2.772815   | 3.670474  |
| C | -28.970293 | -21.617328 | 3.626365  |
| C | -14.224371 | -21.699023 | 3.609035  |
| C | -21.525785 | -8.878798  | 3.650165  |
| C | -28.827199 | 3.941426   | 3.691295  |
| C | 0.521548   | -21.780719 | 3.591705  |
| C | -6.779866  | -8.960494  | 3.632835  |
| C | -14.081279 | 3.859731   | 3.673965  |
| C | 29.377862  | -20.450253 | 3.630111  |
| C | -14.891018 | -20.531949 | 3.612781  |
| C | -22.192432 | -7.711723  | 3.653911  |
| C | -29.493846 | 5.108503   | 3.695041  |
| C | -0.145096  | -20.613645 | 3.595452  |
| C | -7.446510  | -7.793418  | 3.636582  |
| C | -14.747925 | 5.026807   | 3.677711  |
| C | 28.755957  | -19.352961 | 3.633628  |
| C | -15.512923 | -19.434656 | 3.616298  |
| C | -22.814337 | -6.614432  | 3.657428  |
| C | 28.899049  | 6.205794   | 3.698558  |
| C | -0.767001  | -19.516352 | 3.598968  |
| C | -8.068415  | -6.696128  | 3.640098  |
| C | -15.369829 | 6.124099   | 3.681228  |
| C | -20.930641 | -14.900908 | 3.634136  |
| C | -28.232055 | -2.080683  | 3.675266  |
| C | -6.184720  | -14.982604 | 3.616806  |
| C | -13.486135 | -2.162379  | 3.657936  |
| C | -20.787548 | 10.657846  | 3.699066  |
| C | -21.563437 | -15.981882 | 3.632118  |
| C | -28.864851 | -3.161655  | 3.673247  |
| C | -6.817516  | -16.063577 | 3.614788  |
| C | -14.118930 | -3.243351  | 3.655918  |
| C | -21.420344 | 9.576873   | 3.697048  |
| C | -22.242792 | -17.141563 | 3.629953  |
| C | 29.470594  | -4.321339  | 3.671083  |
| C | -7.496872  | -17.223259 | 3.612623  |
| C | -14.798286 | -4.403034  | 3.653753  |
| C | -22.099700 | 8.417193   | 3.694883  |
| C | 7.249051   | -17.304954 | 3.595293  |
| C | -0.052364  | -4.484730  | 3.636423  |
| C | -7.353778  | 8.335497   | 3.677553  |
| C | -22.877967 | -18.231469 | 3.627914  |
| C | 28.835419  | -5.411243  | 3.669044  |
| C | -8.132046  | -18.313165 | 3.610585  |
| C | -15.433460 | -5.492939  | 3.651714  |
| C | -22.734874 | 7.327286   | 3.692844  |
| C | 6.613874   | -18.394860 | 3.593255  |
| C | -0.687540  | -5.574634  | 3.634385  |

|   |            |            |          |
|---|------------|------------|----------|
| C | -7.988953  | 7.245590   | 3.675515 |
| C | -16.646928 | -12.457712 | 3.635385 |
| C | -23.948343 | 0.362514   | 3.676515 |
| C | -16.503834 | 13.101044  | 3.700315 |
| C | -1.901006  | -12.539408 | 3.618055 |
| C | -9.202420  | 0.280819   | 3.659185 |
| C | 28.874038  | -12.383332 | 3.651242 |
| C | 29.017132  | 13.175421  | 3.716172 |
| C | -15.394841 | -12.465028 | 3.633912 |
| C | -22.696254 | 0.355194   | 3.675042 |
| C | -15.251748 | 13.093725  | 3.698842 |
| C | -0.648922  | -12.546724 | 3.616582 |
| C | -7.950333  | 0.273499   | 3.657712 |
| C | -28.797942 | -12.390329 | 3.649665 |
| C | -14.052021 | -12.472024 | 3.632335 |
| C | -21.353436 | 0.348202   | 3.673465 |
| C | 0.693899   | -12.553720 | 3.615005 |
| C | -6.607516  | 0.266506   | 3.656135 |
| C | -20.235017 | -25.216479 | 3.607055 |
| C | -27.536431 | -12.396253 | 3.648185 |
| C | -5.489096  | -25.298175 | 3.589725 |
| C | -12.790510 | -12.477949 | 3.630855 |
| C | -20.091922 | 0.342274   | 3.671985 |
| C | 9.256825   | -25.379870 | 3.572396 |
| C | 1.955410   | -12.559644 | 3.613526 |
| C | -5.346002  | 0.260578   | 3.654655 |
| C | -18.081950 | -14.916589 | 3.630788 |
| C | -25.383363 | -2.096364  | 3.671918 |
| C | -3.336029  | -14.998284 | 3.613459 |
| C | -10.637443 | -2.178060  | 3.654588 |
| C | -17.938857 | 10.642166  | 3.695718 |
| C | -17.459671 | -16.003646 | 3.627297 |
| C | -24.761085 | -3.183420  | 3.668427 |
| C | -2.713749  | -16.085342 | 3.609967 |
| C | -10.015164 | -3.265116  | 3.651097 |
| C | -17.316577 | 9.555109   | 3.692227 |
| C | -16.794500 | -17.171799 | 3.623550 |
| C | -24.095913 | -4.351573  | 3.664680 |
| C | -2.048579  | -17.253494 | 3.606220 |
| C | -9.349992  | -4.433269  | 3.647350 |
| C | -16.651406 | 8.386955   | 3.688480 |
| C | 28.097429  | -18.187158 | 3.637362 |
| C | -16.171450 | -18.268854 | 3.620032 |
| C | -23.472864 | -5.448630  | 3.661162 |
| C | 28.240523  | 7.371595   | 3.702292 |
| C | -1.425528  | -18.350549 | 3.602702 |
| C | -8.726942  | -5.530325  | 3.643832 |
| C | -16.028355 | 7.289899   | 3.684962 |
| C | -25.498468 | -22.720326 | 3.619524 |
| C | -10.752546 | -22.802021 | 3.602194 |
| C | -18.053960 | -9.981796  | 3.643324 |
| C | -25.355375 | 2.838430   | 3.684454 |
| C | 3.993374   | -22.883717 | 3.584865 |
| C | -3.308040  | -10.063492 | 3.625995 |
| C | -10.609454 | 2.756735   | 3.667124 |
| C | -24.864717 | -21.639793 | 3.621540 |
| C | -10.118796 | -21.721488 | 3.604211 |
| C | -17.420209 | -8.901263  | 3.645341 |
| C | -24.721623 | 3.918962   | 3.686470 |
| C | 4.627125   | -21.803184 | 3.586881 |
| C | -2.674289  | -8.982959  | 3.628011 |
| C | -9.975702  | 3.837267   | 3.669141 |
| C | -24.186416 | -20.478879 | 3.623710 |
| C | -9.440496  | -20.560574 | 3.606380 |
| C | -16.741910 | -7.740349  | 3.647510 |

|   |            |            |          |
|---|------------|------------|----------|
| C | -24.043324 | 5.079878   | 3.688640 |
| C | 5.305424   | -20.642270 | 3.589050 |
| C | -1.995989  | -7.822044  | 3.630180 |
| C | -9.297404  | 4.998182   | 3.671310 |
| C | -23.551335 | -19.388627 | 3.625749 |
| C | 28.162050  | -6.568401  | 3.666879 |
| C | -8.805414  | -19.470322 | 3.608419 |
| C | -16.106828 | -6.650097  | 3.649549 |
| C | -23.408241 | 6.170127   | 3.690679 |
| C | 5.940507   | -19.552018 | 3.591089 |
| C | -1.360907  | -6.731793  | 3.632219 |
| C | -8.662322  | 6.088432   | 3.673349 |
| C | 29.230453  | -25.163026 | 3.618279 |
| C | -15.038427 | -25.244721 | 3.600950 |
| C | -22.339687 | -12.424765 | 3.642079 |
| C | 29.373699  | 0.395461   | 3.683208 |
| C | -0.292505  | -25.326417 | 3.583620 |
| C | -7.593766  | -12.506461 | 3.624749 |
| C | -14.895181 | 0.313766   | 3.665879 |
| C | 27.977838  | -25.154834 | 3.619755 |
| C | -16.291041 | -25.236530 | 3.602425 |
| C | -23.592455 | -12.416303 | 3.643555 |
| C | 28.120931  | 0.403922   | 3.684685 |
| C | -1.545120  | -25.318225 | 3.585095 |
| C | -8.846534  | -12.497999 | 3.626225 |
| C | -16.147948 | 0.322226   | 3.667355 |
| C | -17.634679 | -25.228817 | 3.604005 |
| C | -24.936094 | -12.408591 | 3.645134 |
| C | -2.888758  | -25.310512 | 3.586675 |
| C | -10.190172 | -12.490287 | 3.627805 |
| C | -17.491585 | 0.329937   | 3.668935 |
| C | 11.857162  | -25.392208 | 3.569345 |
| C | 4.555747   | -12.571982 | 3.610475 |
| C | -2.745666  | 0.248242   | 3.651605 |
| C | -18.897001 | -25.222475 | 3.605486 |
| C | -26.198415 | -12.402250 | 3.646616 |
| C | -4.151079  | -25.304171 | 3.588157 |
| C | -11.452493 | -12.483945 | 3.629287 |
| C | -18.753908 | 0.336280   | 3.670416 |
| C | 10.594840  | -25.385866 | 3.570827 |
| C | 3.293426   | -12.565641 | 3.611957 |
| C | -4.007987  | 0.254584   | 3.653087 |
| C | -18.051733 | -12.449403 | 3.637037 |
| C | -25.353147 | 0.370823   | 3.678167 |
| C | -17.908639 | 13.109352  | 3.701967 |
| C | -3.305811  | -12.531099 | 3.619707 |
| C | -10.607225 | 0.289127   | 3.660837 |
| C | -27.651347 | -23.925825 | 3.618954 |
| C | -12.905425 | -24.007521 | 3.601624 |
| C | -20.206839 | -11.187295 | 3.642754 |
| C | -27.508253 | 1.632930   | 3.683884 |
| C | 1.840496   | -24.089216 | 3.584294 |
| C | -5.460918  | -11.268991 | 3.625424 |
| C | -12.762332 | 1.551234   | 3.666554 |
| C | -20.220805 | -13.686993 | 3.636403 |
| C | -27.522219 | -0.866767  | 3.677533 |
| C | -5.474882  | -13.768689 | 3.619074 |
| C | -12.776296 | -0.948463  | 3.660204 |
| C | -20.077709 | 11.871762  | 3.701333 |
| C | -28.378830 | -25.171528 | 3.616626 |
| C | -13.632909 | -25.253223 | 3.599296 |
| C | -20.934322 | -12.432999 | 3.640426 |
| C | -28.235737 | 0.387227   | 3.681556 |
| C | 1.113012   | -25.334919 | 3.581966 |
| C | -6.188401  | -12.514695 | 3.623096 |

|   |            |            |          |
|---|------------|------------|----------|
| C | -13.489816 | 0.305532   | 3.664226 |
| C | -18.778912 | -13.695019 | 3.634709 |
| C | -26.080326 | -0.874794  | 3.675839 |
| C | -4.032990  | -13.776714 | 3.617379 |
| C | -11.334404 | -0.956490  | 3.658509 |
| C | -18.635818 | 11.863736  | 3.699639 |
| C | -26.209409 | -23.933852 | 3.617259 |
| C | -11.463489 | -24.015547 | 3.599929 |
| C | -18.764903 | -11.195323 | 3.641059 |
| C | -26.066317 | 1.624903   | 3.682189 |
| C | 3.282431   | -24.097243 | 3.582599 |
| C | -4.018982  | -11.277019 | 3.623729 |
| C | -11.320396 | 1.543208   | 3.664859 |
| C | -21.496529 | -25.210553 | 3.608535 |
| C | -6.750607  | -25.292249 | 3.591205 |
| C | 7.995312   | -25.373944 | 3.573876 |
| C | -20.773914 | 15.585495  | 3.711600 |
| C | -21.396173 | 16.672411  | 3.715091 |
| C | -22.062818 | 17.839486  | 3.718838 |
| C | -22.684722 | 18.936779  | 3.722355 |
| C | -28.102442 | 23.470526  | 3.740192 |
| C | -28.735237 | 22.389553  | 3.738174 |
| C | -29.414593 | 21.229872  | 3.736009 |
| C | -14.668671 | 21.148176  | 3.718679 |
| C | 28.965033  | 20.139966  | 3.733971 |
| C | -15.303848 | 20.058270  | 3.716641 |
| C | -27.406817 | 13.154956  | 3.713112 |
| C | -12.660897 | 13.073260  | 3.695782 |
| C | -25.253750 | 23.454846  | 3.736845 |
| C | -24.631471 | 22.367788  | 3.733353 |
| C | -23.966300 | 21.199636  | 3.729606 |
| C | -23.343249 | 20.102581  | 3.726088 |
| C | -17.924347 | 15.569414  | 3.708251 |
| C | -17.290596 | 16.649947  | 3.710267 |
| C | -16.612297 | 17.810861  | 3.712436 |
| C | 28.291665  | 18.982808  | 3.731805 |
| C | -15.977215 | 18.901113  | 3.714476 |
| C | -22.210226 | 13.126713  | 3.707006 |
| C | -23.462841 | 13.134905  | 3.708481 |
| C | -24.806479 | 13.142618  | 3.710061 |
| C | -10.060560 | 13.060923  | 3.692731 |
| C | -26.068801 | 13.148960  | 3.711543 |
| C | -11.322881 | 13.067264  | 3.694213 |
| C | -20.077225 | 14.363914  | 3.707680 |
| C | -27.392604 | 24.684442  | 3.742460 |
| C | -20.804709 | 13.118212  | 3.705352 |
| C | -25.950711 | 24.676416  | 3.740765 |
| C | -18.635290 | 14.355888  | 3.705986 |
| C | -28.668329 | 13.160882  | 3.714591 |
| C | -13.922409 | 13.079186  | 3.697262 |
| C | -24.077959 | -25.189458 | 3.611586 |
| C | -9.332039  | -25.271154 | 3.594256 |
| C | 5.413883   | -25.352850 | 3.576927 |
| C | -22.825872 | -25.196777 | 3.610114 |
| C | -8.079951  | -25.278473 | 3.592784 |
| C | 6.665969   | -25.360168 | 3.575454 |
| C | -25.482764 | -25.181151 | 3.613238 |
| C | -10.736843 | -25.262846 | 3.595909 |
| C | 4.009078   | -25.344542 | 3.578579 |
| C | 15.912356  | -22.949457 | 3.570858 |
| C | 8.610941   | -10.129230 | 3.611988 |
| C | 1.309528   | 2.690994   | 3.653118 |
| C | 23.356863  | -10.210926 | 3.594658 |
| C | 16.055450  | 2.609299   | 3.635788 |
| C | 15.290097  | -21.862540 | 3.574349 |

|   |           |            |          |
|---|-----------|------------|----------|
| C | 7.988683  | -9.042315  | 3.615479 |
| C | 0.687270  | 3.777910   | 3.656609 |
| C | 22.734605 | -9.124010  | 3.598149 |
| C | 15.433192 | 3.696214   | 3.639279 |
| C | 14.623452 | -20.695465 | 3.578095 |
| C | 7.322038  | -7.875239  | 3.619225 |
| C | 0.020624  | 4.944986   | 3.660355 |
| C | 22.067958 | -7.956935  | 3.601895 |
| C | 14.766544 | 4.863291   | 3.643025 |
| C | 14.001547 | -19.598173 | 3.581612 |
| C | 6.700133  | -6.777948  | 3.622742 |
| C | -0.601280 | 6.042278   | 3.663872 |
| C | 21.446053 | -6.859644  | 3.605412 |
| C | 14.144639 | 5.960582   | 3.646542 |
| C | 8.583828  | -15.064425 | 3.599450 |
| C | 1.282414  | -2.244200  | 3.640580 |
| C | -6.019001 | 10.576025  | 3.681710 |
| C | 23.329749 | -15.146120 | 3.582120 |
| C | 16.028335 | -2.325895  | 3.623250 |
| C | 8.726921  | 10.494329  | 3.664380 |
| C | 23.472842 | 10.412634  | 3.647050 |
| C | 7.951032  | -16.145398 | 3.597431 |
| C | 0.649618  | -3.325172  | 3.638561 |
| C | -6.651795 | 9.495052   | 3.679691 |
| C | 22.696953 | -16.227094 | 3.580102 |
| C | 15.395539 | -3.406867  | 3.621231 |
| C | 8.094125  | 9.413357   | 3.662361 |
| C | 22.840046 | 9.331661   | 3.645032 |
| C | 22.017598 | -17.386775 | 3.577937 |
| C | 14.716185 | -4.566551  | 3.619067 |
| C | 7.414769  | 8.253677   | 3.660197 |
| C | 22.160690 | 8.171981   | 3.642867 |
| C | 21.382423 | -18.476681 | 3.575898 |
| C | 14.081009 | -5.656455  | 3.617028 |
| C | 6.779596  | 7.163769   | 3.658158 |
| C | 21.525516 | 7.082074   | 3.640828 |
| C | -1.735286 | 13.019223  | 3.682958 |
| C | 12.867542 | -12.621229 | 3.600699 |
| C | 5.566127  | 0.198998   | 3.641828 |
| C | 13.010634 | 12.937527  | 3.665629 |
| C | 27.613462 | -12.702924 | 3.583369 |
| C | 20.312047 | 0.117302   | 3.624499 |
| C | 27.756556 | 12.855832  | 3.648299 |
| C | -0.483199 | 13.011904  | 3.681486 |
| C | 14.119628 | -12.628544 | 3.599226 |
| C | 6.818216  | 0.191678   | 3.640356 |
| C | 14.262723 | 12.930209  | 3.664156 |
| C | 21.564137 | 0.109982   | 3.623026 |
| C | 15.462448 | -12.635541 | 3.597649 |
| C | 8.161034  | 0.184685   | 3.638779 |
| C | 22.906955 | 0.102990   | 3.621449 |
| C | 24.025373 | -25.461691 | 3.555039 |
| C | 16.723959 | -12.641465 | 3.596169 |
| C | 9.422547  | 0.178757   | 3.637299 |
| C | 24.168468 | 0.097062   | 3.619969 |
| C | 11.432519 | -15.080105 | 3.596102 |
| C | 4.131105  | -2.259881  | 3.637232 |
| C | -3.170309 | 10.560345  | 3.678362 |
| C | 26.178440 | -15.161801 | 3.578772 |
| C | 18.877027 | -2.341576  | 3.619902 |
| C | 11.575612 | 10.478650  | 3.661032 |
| C | 26.321533 | 10.396954  | 3.643702 |
| C | 12.054798 | -16.167163 | 3.592611 |
| C | 4.753384  | -3.346937  | 3.633741 |
| C | -2.548029 | 9.473288   | 3.674871 |

|   |           |            |          |
|---|-----------|------------|----------|
| C | 26.800719 | -16.248858 | 3.575281 |
| C | 19.499305 | -3.428632  | 3.616411 |
| C | 12.197891 | 9.391592   | 3.657541 |
| C | 26.943813 | 9.309897   | 3.640211 |
| C | 12.719971 | -17.335315 | 3.588863 |
| C | 5.418556  | -4.515090  | 3.629993 |
| C | -1.882857 | 8.305134   | 3.671123 |
| C | 27.465890 | -17.417011 | 3.571534 |
| C | 20.164477 | -4.596785  | 3.612664 |
| C | 12.863064 | 8.223439   | 3.653793 |
| C | 27.608984 | 8.141743   | 3.636464 |
| C | 13.343020 | -18.432370 | 3.585346 |
| C | 6.041605  | -5.612146  | 3.626476 |
| C | -1.259808 | 7.208078   | 3.667606 |
| C | 20.787526 | -5.693842  | 3.609146 |
| C | 13.486113 | 7.126383   | 3.650276 |
| C | 18.761922 | -22.965538 | 3.567508 |
| C | 11.460508 | -10.145312 | 3.608638 |
| C | 4.159094  | 2.674914   | 3.649768 |
| C | 26.206431 | -10.227008 | 3.591308 |
| C | 18.905015 | 2.593218   | 3.632438 |
| C | 19.395673 | -21.885005 | 3.569524 |
| C | 12.094259 | -9.064779  | 3.610654 |
| C | 4.792846  | 3.755446   | 3.651784 |
| C | 26.840181 | -9.146475  | 3.593325 |
| C | 19.538767 | 3.673750   | 3.634454 |
| C | 20.073974 | -20.724090 | 3.571694 |
| C | 12.772560 | -7.903865  | 3.612824 |
| C | 5.471146  | 4.916361   | 3.653953 |
| C | 27.518480 | -7.985561  | 3.595494 |
| C | 20.217066 | 4.834666   | 3.636624 |
| C | 20.709055 | -19.633839 | 3.573733 |
| C | 13.407641 | -6.813613  | 3.614863 |
| C | 6.106228  | 6.006611   | 3.655993 |
| C | 20.852149 | 5.924915   | 3.638663 |
| C | 14.476043 | -25.408238 | 3.566263 |
| C | 7.174783  | -12.588281 | 3.607392 |
| C | -0.126632 | 0.231945   | 3.648522 |
| C | 21.920703 | -12.669977 | 3.590063 |
| C | 14.619289 | 0.150249   | 3.631192 |
| C | 13.223428 | -25.400046 | 3.567739 |
| C | 5.922015  | -12.579820 | 3.608869 |
| C | -1.379399 | 0.240405   | 3.649998 |
| C | 20.667936 | -12.661515 | 3.591539 |
| C | 13.366521 | 0.158710   | 3.632669 |
| C | 26.625711 | -25.474029 | 3.551989 |
| C | 19.324297 | -12.653803 | 3.593119 |
| C | 12.022883 | 0.166421   | 3.634248 |
| C | 26.768805 | 0.084725   | 3.616919 |
| C | 25.363389 | -25.467687 | 3.553470 |
| C | 18.061975 | -12.647462 | 3.594600 |
| C | 10.760561 | 0.172763   | 3.635730 |
| C | 25.506483 | 0.091068   | 3.618400 |
| C | -3.140091 | 13.027531  | 3.684611 |
| C | 11.462737 | -12.612920 | 3.602351 |
| C | 4.161323  | 0.207307   | 3.643481 |
| C | 11.605830 | 12.945835  | 3.667281 |
| C | 26.208657 | -12.694615 | 3.585021 |
| C | 18.907243 | 0.125611   | 3.626151 |
| C | 26.351751 | 12.864140  | 3.649951 |
| C | 16.609043 | -24.171037 | 3.566938 |
| C | 9.307630  | -11.350812 | 3.608068 |
| C | 2.006216  | 1.469413   | 3.649198 |
| C | 24.053551 | -11.432507 | 3.590738 |
| C | 16.752137 | 1.387718   | 3.631868 |

|   |            |            |          |
|---|------------|------------|----------|
| C | 9.293665   | -13.850510 | 3.601717 |
| C | 1.992251   | -1.030283  | 3.642847 |
| C | -5.309162  | 11.789941  | 3.683977 |
| C | 24.039585  | -13.932205 | 3.584388 |
| C | 16.738171  | -1.111979  | 3.625517 |
| C | 9.436758   | 11.708245  | 3.666647 |
| C | 24.182681  | 11.626550  | 3.649318 |
| C | 15.881561  | -25.416740 | 3.564610 |
| C | 8.580148   | -12.596516 | 3.605740 |
| C | 1.278733   | 0.223711   | 3.646870 |
| C | 23.326068  | -12.678211 | 3.588410 |
| C | 16.024653  | 0.142015   | 3.629540 |
| C | 10.735558  | -13.858535 | 3.600023 |
| C | 3.434145   | -1.038311  | 3.641153 |
| C | -3.867271  | 11.781915  | 3.682282 |
| C | 25.481478  | -13.940231 | 3.582693 |
| C | 18.180064  | -1.120006  | 3.623823 |
| C | 10.878650  | 11.700220  | 3.664953 |
| C | 25.624572  | 11.618524  | 3.647623 |
| C | 18.050981  | -24.179064 | 3.565243 |
| C | 10.749567  | -11.358839 | 3.606373 |
| C | 3.448153   | 1.461387   | 3.647503 |
| C | 25.495487  | -11.440535 | 3.589043 |
| C | 18.194073  | 1.379691   | 3.630173 |
| C | 22.763861  | -25.455765 | 3.556519 |
| C | -6.005366  | 15.503674  | 3.694244 |
| C | 8.740556   | 15.421978  | 3.676914 |
| C | 23.486476  | 15.340283  | 3.659584 |
| C | -6.627624  | 16.590590  | 3.697735 |
| C | 8.118297   | 16.508895  | 3.680405 |
| C | 22.864217  | 16.427199  | 3.663075 |
| C | -7.294270  | 17.757665  | 3.701481 |
| C | 7.451651   | 17.675969  | 3.684152 |
| C | 22.197572  | 17.594274  | 3.666822 |
| C | -7.916174  | 18.854958  | 3.704998 |
| C | 6.829746   | 18.773262  | 3.687668 |
| C | 21.575668  | 18.691567  | 3.670339 |
| C | -13.333894 | 23.388706  | 3.722836 |
| C | 1.412028   | 23.307010  | 3.705506 |
| C | 16.157948  | 23.225315  | 3.688176 |
| C | -13.966689 | 22.307732  | 3.720817 |
| C | 0.779232   | 22.226037  | 3.703488 |
| C | 15.525153  | 22.144341  | 3.686158 |
| C | 0.099876   | 21.066355  | 3.701323 |
| C | 14.845797  | 20.984660  | 3.683993 |
| C | -0.535298  | 19.976449  | 3.699284 |
| C | 14.210623  | 19.894754  | 3.681955 |
| C | 2.107652   | 12.991439  | 3.678425 |
| C | 16.853573  | 12.909744  | 3.661096 |
| C | -10.485203 | 23.373025  | 3.719488 |
| C | 4.260719   | 23.291330  | 3.702158 |
| C | 19.006640  | 23.209634  | 3.684829 |
| C | -9.862923  | 22.285968  | 3.715997 |
| C | 4.882998   | 22.204272  | 3.698667 |
| C | 19.628920  | 22.122576  | 3.681338 |
| C | -9.197751  | 21.117815  | 3.712250 |
| C | 5.548169   | 21.036120  | 3.694920 |
| C | 20.294090  | 20.954424  | 3.677590 |
| C | -8.574702  | 20.020760  | 3.708732 |
| C | 6.171219   | 19.939065  | 3.691402 |
| C | 20.917141  | 19.857369  | 3.674072 |
| C | -3.155799  | 15.487593  | 3.690894 |
| C | 11.590122  | 15.405897  | 3.673565 |
| C | 26.336043  | 15.324202  | 3.656235 |
| C | -2.522048  | 16.568126  | 3.692911 |

|   |            |            |             |
|---|------------|------------|-------------|
| C | 12.223873  | 16.486430  | 3.675581    |
| C | 26.969794  | 16.404735  | 3.658251    |
| C | -1.843747  | 17.729040  | 3.695080    |
| C | 12.902173  | 17.647344  | 3.677750    |
| C | 27.648093  | 17.565649  | 3.660420    |
| C | -1.208667  | 18.819292  | 3.697119    |
| C | 13.537255  | 18.737596  | 3.679789    |
| C | -7.441678  | 13.044892  | 3.689649    |
| C | 7.304242   | 12.963197  | 3.672320    |
| C | 22.050164  | 12.881501  | 3.654990    |
| C | -8.694293  | 13.053084  | 3.691125    |
| C | 6.051627   | 12.971389  | 3.673795    |
| C | 20.797549  | 12.889693  | 3.656465    |
| C | 4.707989   | 12.979102  | 3.675375    |
| C | 19.453911  | 12.897406  | 3.658045    |
| C | 3.445668   | 12.985443  | 3.676857    |
| C | 18.191589  | 12.903748  | 3.659527    |
| C | -5.308678  | 14.282093  | 3.690324    |
| C | 9.437244   | 14.200398  | 3.672994    |
| C | 24.183165  | 14.118702  | 3.655664    |
| C | -12.624056 | 24.602621  | 3.725103    |
| C | 2.121864   | 24.520925  | 3.707774    |
| C | 16.867787  | 24.439230  | 3.690444    |
| C | -6.036161  | 13.036391  | 3.687996    |
| C | 8.709760   | 12.954695  | 3.670666    |
| C | 23.455681  | 12.873000  | 3.653336    |
| C | -11.182164 | 24.594595  | 3.723409    |
| C | 3.563757   | 24.512900  | 3.706079    |
| C | 18.309679  | 24.431204  | 3.688749    |
| C | -3.866740  | 14.274067  | 3.688629    |
| C | 10.879180  | 14.192371  | 3.671299    |
| C | 25.625100  | 14.110676  | 3.653970    |
| C | 0.846140   | 12.997365  | 3.679905    |
| C | 15.592061  | 12.915670  | 3.662576    |
| C | 20.182431  | -25.434670 | 3.559570    |
| C | 21.434518  | -25.441989 | 3.558098    |
| C | 18.777626  | -25.426363 | 3.561223    |
| N | 9.327086   | 0.150060   | -27.752202  |
| N | 9.998543   | -0.519726  | -27.194948  |
| N | -3.925034  | 2.551082   | 60.215961   |
| N | -4.812391  | 2.033886   | 60.609798   |
| N | -5.014444  | 9.595126   | -5.512747   |
| N | -3.980357  | 9.335705   | -5.783607   |
| N | -0.532473  | -23.134723 | 30.746554   |
| N | -0.356911  | -23.488087 | 31.773350   |
| N | 0.523796   | -15.727572 | 8.597231    |
| N | 1.279053   | -15.027883 | 8.984557    |
| N | 21.451307  | -24.385333 | -40.847611  |
| N | 21.188121  | -23.813188 | -41.749489  |
| N | -21.159634 | 21.428920  | 122.437957  |
| N | -21.264573 | 20.706667  | 123.260963  |
| N | 16.147141  | 10.197116  | -10.640146  |
| N | 17.096895  | 10.749384  | -10.585683  |
| N | 15.481310  | -8.150965  | 115.823389  |
| N | 16.121996  | -7.597115  | 115.121414  |
| N | 6.295788   | 1.898203   | -87.824645  |
| N | 7.278748   | 2.100948   | -88.274849  |
| N | 12.384815  | -12.807091 | -122.175052 |
| N | 12.565192  | -13.697539 | -122.795187 |
| N | -22.048929 | -21.076079 | -0.241910   |
| N | -21.740270 | -20.326014 | 0.501145    |
| N | -17.120529 | -24.805248 | -49.125773  |
| N | -18.117899 | -24.406100 | -48.889268  |
| N | -0.825652  | 0.895237   | -127.724647 |
| N | -1.090699  | 0.191038   | -126.922242 |

|   |            |            |             |
|---|------------|------------|-------------|
| N | 4.194798   | 16.643738  | 2.126774    |
| N | 4.717872   | 16.119910  | 2.940407    |
| N | -23.065261 | 14.983033  | -20.386397  |
| N | -23.712055 | 15.871559  | -20.433092  |
| N | -23.894452 | -8.880104  | -61.880069  |
| N | -23.435459 | -7.884324  | -61.968087  |
| N | -14.364894 | -5.708152  | -74.720848  |
| N | -15.378926 | -5.359824  | -74.966626  |
| N | 29.473862  | -9.197872  | 9.989500    |
| N | 29.484491  | -8.113047  | 9.807723    |
| N | 12.927016  | -23.650594 | -58.968279  |
| N | 13.908025  | -24.135517 | -58.856606  |
| N | 0.484556   | -15.101196 | -46.900443  |
| N | -0.486601  | -14.603391 | -46.762438  |
| N | 14.302471  | -13.337239 | 65.504598   |
| N | 13.937344  | -13.909508 | 64.639039   |
| N | -10.406389 | -9.313039  | -2.705645   |
| N | -11.458405 | -9.023459  | -2.566340   |
| N | -19.012934 | -0.247556  | -17.607063  |
| N | -18.398617 | 0.560830   | -18.030296  |
| N | -28.411633 | 25.126319  | -4.200209   |
| N | -28.019776 | -25.080265 | -3.706926   |
| N | 24.716127  | -0.514069  | 22.235971   |
| N | 24.032954  | -1.041465  | 21.553969   |
| N | 1.554054   | 7.512177   | 27.981949   |
| N | 1.319796   | 7.688897   | 26.921811   |
| N | 28.044338  | -9.841750  | -58.148426  |
| N | 28.357552  | -10.498945 | -58.973042  |
| N | 15.729047  | -7.432110  | 15.699501   |
| N | 14.849334  | -7.060595  | 15.153533   |
| N | 6.868739   | 14.252684  | -45.675275  |
| N | 6.347390   | 13.290681  | -45.562382  |
| N | -0.927571  | -1.520220  | -107.515909 |
| N | -1.866324  | -1.964707  | -107.153730 |
| N | -9.437562  | 1.386159   | -80.522922  |
| N | -10.437601 | 0.929411   | -80.559019  |
| N | -13.984031 | -22.827918 | 78.328227   |
| N | -12.954214 | -22.730465 | 77.954088   |
| N | 19.288196  | -18.444776 | 36.649150   |
| N | 18.245892  | -18.134587 | 36.814637   |
| N | 23.180234  | 23.196957  | 23.027192   |
| N | 23.929235  | 23.092634  | 22.228372   |
| N | -7.064055  | 7.978871   | -99.444170  |
| N | -7.641110  | 7.059751   | -99.623680  |
| N | -24.925106 | -19.661678 | 13.188426   |
| N | -25.694048 | -20.121648 | 13.826513   |
| N | -18.868107 | -7.650571  | -4.109563   |
| N | -18.533991 | -7.279249  | -5.089607   |
| N | 19.494153  | 3.723636   | -124.128298 |
| N | 20.334029  | 3.453115   | -123.471467 |
| N | -20.113858 | -15.083169 | 20.307815   |
| N | -19.772632 | -14.849033 | 19.288626   |
| N | -16.793323 | -24.669313 | 120.374646  |
| N | -16.117901 | -24.300811 | 121.160783  |
| N | -8.805802  | 22.912983  | 7.992773    |
| N | -9.792103  | 23.036525  | 8.463886    |
| N | -22.530093 | -2.056103  | -38.379602  |
| N | -22.889604 | -2.076678  | -37.340214  |
| N | -15.842656 | 18.443985  | -4.664110   |
| N | -15.361550 | 18.493902  | -3.676160   |
| N | -19.141404 | -0.895896  | -48.775037  |
| N | -19.041605 | -1.849315  | -48.235564  |
| N | 9.527610   | -8.619994  | -18.792847  |
| N | 10.267923  | -8.734317  | -17.987323  |
| N | 13.529504  | -21.279280 | -3.897483   |

N 14.160165 -22.148314 -4.136329  
N -14.828182 -19.330075 -84.688551  
N -15.686816 -18.748028 -84.322534  
N -4.720244 4.675412 3.250067  
N -4.485399 3.856211 3.945595  
N 5.481540 -15.685922 25.023589  
N 4.785446 -14.862950 24.804111  
Oc 22.388449 6.423670 10.899625  
Cc 21.793589 6.613475 9.919645  
Oc 21.198730 6.803281 8.939666  
Oc 23.249958 17.809048 -124.792162  
Cc 23.137352 18.646301 -123.994309  
Oc 23.024746 19.483555 -123.196456  
Oc 22.922764 -10.937940 74.923157  
Cc 24.007305 -11.154815 74.566814  
Oc 25.091846 -11.371689 74.210471  
Oc 28.079755 17.264659 126.773361  
Cc 29.180769 17.157343 126.417698  
Oc -28.733017 17.050028 126.062035  
Oc -26.673861 2.515494 -72.498827  
Cc -27.463989 3.060270 -71.843723  
Oc -28.254116 3.605046 -71.188619  
Oc -21.343917 7.246912 22.685388  
Cc -21.217203 6.362245 21.942722  
Oc -21.090488 5.477579 21.200056  
Oc 28.415092 -23.521060 7.037428  
Cc 29.317332 -24.250697 6.975481  
Oc -28.795228 -24.980334 6.913535  
Oc -15.035011 -9.074873 7.985290  
Cc -15.392407 -7.969465 8.009465  
Oc -15.749803 -6.864056 8.033640  
Oc 17.120597 16.765853 1.044926  
Cc 15.991246 16.535595 1.192545  
Oc 14.861895 16.305338 1.340165  
Oc 24.604894 21.547945 89.722774  
Cc 24.454475 22.678467 89.945346  
Oc 24.304055 23.808989 90.167919  
Oc -19.889113 12.172031 6.622363  
Cc -19.271858 11.197414 6.761513  
Oc -18.654604 10.222797 6.900662  
Oc -11.471888 16.056116 123.138292  
Cc -11.703195 15.895753 124.265690  
Oc -11.934502 15.735390 125.393087  
Oc -6.881831 -2.579838 2.464892  
Cc -5.724421 -2.665256 2.407016  
Oc -4.567010 -2.750674 2.349141  
Oc 21.965670 -5.310769 -123.065917  
Cc 22.291263 -6.093451 -122.271159  
Oc 22.616856 -6.876134 -121.476400  
Oc -19.842595 -8.108546 35.520092  
Cc -19.509008 -8.486687 34.473205  
Oc -19.175422 -8.864828 33.426318  
Oc -23.926950 -5.618574 -48.887039  
Cc -23.489406 -6.636111 -48.535730  
Oc -23.051862 -7.653648 -48.184421  
Oc -13.708624 22.438973 -114.245806  
Cc -13.685620 23.534215 -113.858301  
Oc -13.662615 24.629456 -113.470796  
Oc -9.712611 -4.619200 -65.671788  
Cc -10.678151 -4.748917 -66.305151  
Oc -11.643692 -4.878633 -66.938515  
Oc -23.231933 -24.835126 -50.400328  
Cc -24.005226 -24.445348 -49.625515  
Oc -24.778520 -24.055570 -48.850703  
Oc -10.826445 25.492885 104.117445

Cc -10.887154 -25.498053 105.271906  
Oc -10.947864 -25.380674 106.426367  
Oc -13.765884 -21.155449 25.102070  
Cc -14.575546 -20.710114 25.806604  
Oc -15.385209 -20.264780 26.511137  
Oc -20.016541 11.395639 -3.109117  
Cc -19.510693 10.381766 -3.366847  
Oc -19.004845 9.367894 -3.624577  
Oc -22.129309 -4.370908 -117.642266  
Cc -23.087598 -4.937475 -117.975325  
Oc -24.045887 -5.504043 -118.308385  
Oc 4.879750 5.072797 47.974592  
Cc 4.391936 4.404745 48.790672  
Oc 3.904122 3.736693 49.606753  
Oc -1.113307 0.845982 74.971639  
Cc -1.426221 -0.128593 74.421610  
Oc -1.739136 -1.103168 73.871580  
Oc -5.190614 7.092108 -9.327588  
Cc -5.078586 6.274509 -10.145650  
Oc -4.966557 5.456910 -10.963713  
Oc -18.540730 22.214804 3.222882  
Cc -17.857676 22.429694 4.138034  
Oc -17.174622 22.644584 5.053186  
Oc -24.362284 10.332858 97.168468  
Cc -23.819992 10.904622 98.022430  
Oc -23.277701 11.476386 98.876391  
Oc 9.926153 15.717537 -114.652661  
Cc 10.675450 16.502861 -114.237855  
Oc 11.424746 17.288186 -113.823048  
Oc -15.196270 -7.665058 -0.946815  
Cc -14.384530 -7.780291 -0.123381  
Oc -13.572790 -7.895523 0.700053  
Oc -7.204862 4.369999 -0.726047  
Cc -6.537750 5.281644 -0.998277  
Oc -5.870637 6.193289 -1.270506  
Oc 27.749315 -20.725581 -3.534817  
Cc 27.960076 -19.590794 -3.400340  
Oc 28.170837 -18.456008 -3.265863  
Oc 22.964477 21.815014 -2.270091  
Cc 23.075293 21.950874 -3.418789  
Oc 23.186108 22.086733 -4.567487  
Oc 7.670449 -12.047855 6.685900  
Cc 6.822891 -11.407713 7.157182  
Oc 5.975333 -10.767571 7.628465  
Oc -16.359828 5.833790 62.418690  
Cc -16.081757 4.710213 62.316246  
Oc -15.803686 3.586636 62.213801  
Oc 16.302468 10.926081 -21.230688  
Cc 15.726876 11.935442 -21.219360  
Oc 15.151283 12.944803 -21.208033  
Oc -19.052321 -17.521249 16.713381  
Cc -18.355960 -17.003402 15.940620  
Oc -17.659600 -16.485555 15.167859  
Oc -2.150358 -8.513636 31.639348  
Cc -2.440855 -9.598818 31.936390  
Oc -2.731351 -10.684001 32.233433  
Oc -7.648959 -11.978476 25.453650  
Cc -8.567764 -12.680457 25.338478  
Oc -9.486568 -13.382439 25.223307  
Oc 29.277123 -22.298358 100.492178  
Cc -28.787468 -21.668167 100.716244  
Oc -27.837259 -21.037976 100.940311  
Oc -21.848680 22.574980 -0.951365  
Cc -22.010883 22.439021 0.191198  
Oc -22.173087 22.303062 1.333760

Oc 3.786083 -6.685496 20.414657  
Cc 4.754476 -7.249284 20.722232  
Oc 5.722869 -7.813073 21.029806  
Oc -27.486728 -22.670966 38.545422  
Cc -27.362372 -23.314124 39.505176  
Oc -27.238017 -23.957282 40.464930  
Oc 19.232498 -1.905000 -38.409783  
Cc 19.637643 -1.683601 -37.343442  
Oc 20.042789 -1.462202 -36.277101  
Oc -4.512438 -15.813912 -58.996279  
Cc -3.777006 -14.960285 -58.712193  
Oc -3.041574 -14.106659 -58.428108  
Oc 4.645109 21.822428 10.880056  
Cc 4.267178 21.210583 9.967336  
Oc 3.889247 20.598738 9.054616  
Oc 8.773714 3.210376 31.272969  
Cc 9.667610 3.076706 32.003261  
Oc 10.561505 2.943036 32.733554  
Oc -13.007494 9.835953 -0.294174  
Cc -12.828862 9.456490 -1.377845  
Oc -12.650229 9.077027 -2.461516  
Oc -2.070262 -10.259421 -51.717513  
Cc -1.637283 -10.139321 -52.789124  
Oc -1.204304 -10.019220 -53.860735  
Oc 5.973254 -10.758088 -23.630593  
Cc 5.965551 -10.014926 -24.523842  
Oc 5.957848 -9.271764 -25.417092
